# Supplementary material for: Genetically manipulating endogenous Kras levels and oncogenic mutations in vivo influences tissue patterning of murine tumorigenesis
Source: eLife. 2022 Sep 7;11:e75715. doi: 10.7554/eLife.75715 (PMC9451540; doi:10.7554/eLife.75715)
Supplement: Figure 1—source data 5. [file elife-75715-fig1-data5.xlsx]

## Sheet: all wrt WT1
			cT
	Actin		cFOS	Dusp6	Egr1	Fosl1	FOSL2			cFOS	Dusp6	Egr1	Fosl1	FOSL2
WT-1	17.1089		24.5731	22.5842	23.9891	31.6639	24.0439		WT-1	1.00024	1.00084	1.08743	1.00674	1.00546
WT-1	16.9158		24.5067	22.4678	23.9853	31.9236	23.8198		WT-2	0.401843	0.680629	0.139515	3.09763	1.65192
WT-1	16.9311	16.9853	24.5754	22.4503	23.4831	31.516	23.676		NatG12D-1	0.999486	1.03232	1.01229	0.957029	1.12812
WT-2	16.0934		24.8545	22.1005	37.4235	29.1079	22.0984		NatG12D-2	0.536362	1.022	0.265015	1.38965	1.57004
WT-2	15.9021		24.7665	21.9475	37.4933	29.1432	22.1397		NatQ61R-1	0.760714	1.30668	0.498173	1.40188	1.64887
WT-2	15.8761	15.9572	24.8991	22.0394	24.0479	28.8882	22.0465		NatQ61R-2	0.554769	1.0449	0.31596	1.52473	1.84183
NatG12D-1	16.7709		24.2821	22.3141	23.5631	31.1426	23.3125		ComG12D-1	1.17644	1.1843	2.10342	1.82774	2.7286
NatG12D-1	16.6514		24.2234	22.0576	23.6741	31.6101	23.3754		ComG12D-2	1.26146	1.7072	1.04859	5.83993	2.5063
NatG12D-1	16.5422	16.6549	24.1632	22.0191	23.2166	31.6009	23.3395		ComQ61R-1	0.740414	1.83512	0.903927	5.36729	2.29621
NatG12D-2	16.9069		25.2787	22.3881	25.4497	31.0636	23.0332		ComQ61R-2	0.872767	3.50627	1.77213	9.9916	2.43168
NatG12D-2	16.692		25.2219	22.1487	25.4092	31.1943	22.9615
NatG12D-2	16.6075	16.7355	25.1068	22.1356	25.6041	30.7154	22.8492
NatQ61R-1	17.3732		25.2386	22.4863	25.1851	31.4836	23.4476			cFOS	Dusp6	Egr1	Fosl1	FOSL2
NatQ61R-1	17.2846		25.3305	22.4568	25.1703	31.5207	23.4704		WT-1	0.0272423	0.0497831	0.728769	0.140908	0.127208
NatQ61R-1	17.307	17.3216	25.2805	22.4116	25.1277	31.6516	23.4665		WT-2	0.0189292	0.0365135	0.24158	0.303827	0.0535126
NatQ61R-2	17.0942		25.3695	22.4167	25.4085	30.9105	22.8831		NatG12D-1	0.0412087	0.111099	0.172801	0.185655	0.0246656
NatQ61R-2	16.8171		25.388	22.3591	25.3716	31.1056	22.9599		NatG12D-2	0.0328519	0.0977328	0.018555	0.245548	0.101599
NatQ61R-2	16.8615	16.9243	25.2678	22.3542	25.4831	31.0869	22.8718		NatQ61R-1	0.0242085	0.0341628	0.0103381	0.0844971	0.0139379
ComG12D-1	17.2408		24.4685	22.3785	22.8523	31.0419	22.4699		NatQ61R-2	0.0251656	0.0250178	0.0123613	0.116011	0.060634
ComG12D-1	16.8143		24.2722	22.3113	22.8058	31.1195	22.501		ComG12D-1	0.0805551	0.0534605	0.0762531	0.400752	0.107571
ComG12D-1	17.0655	17.0402	24.3829	22.2482	22.7481	30.5622	22.3915		ComG12D-2	0.0948838	0.166663	0.139334	0.540854	0.181404
ComG12D-2	16.6023		23.7979	21.5927	23.6909	28.7231	22.3007		ComQ61R-1	0.0355208	0.177908	0.0366379	0.359301	0.106323
ComG12D-2	16.653		23.9651	21.3127	23.3548	28.9893	22.2635		ComQ61R-2	0.0358828	0.292229	0.113493	0.824786	0.0226997
ComG12D-2	16.8014	16.6856	23.9959	21.3971	23.3344	28.8666	22.1072
ComQ61R-1	16.3722		24.2409	21.0815	23.2624	28.6794	21.8921
ComQ61R-1	16.1533		24.3537	20.8506	23.305	28.517	21.9001
ComQ61R-1	16.2906	16.272	24.2251	20.817	23.1899	28.5015	22.0132
ComQ61R-2	16.3329		24.1652	20.3021	22.4953	27.7471	22.0249
ComQ61R-2	16.4714		24.2825	20.1162	22.3615	27.9842	22.0487
ComQ61R-2	16.557	16.4537	24.2044	20.0699	22.5356	27.8256	22.0258
			dct
			cFOS	Dusp6	Egr1	Fosl1	FOSL2
WT-1			7.5878	5.59892	7.00382	14.6787	7.05866
WT-1			7.52148	5.48258	7.00005	14.9383	6.83453
WT-1			7.59018	5.46499	6.49785	14.5308	6.69071
WT-2			8.89731	6.14328	21.4663	13.1507	6.14119
WT-2			8.80928	5.99028	21.5361	13.186	6.18245
WT-2			8.94193	6.08225	8.09072	12.931	6.08934
NatG12D-1			7.62728	5.65927	6.9082	14.4877	6.65761
NatG12D-1			7.56853	5.40273	7.01929	14.9552	6.72059
NatG12D-1			7.50832	5.36427	6.56172	14.9461	6.68461
NatG12D-2			8.54321	5.65268	8.71424	14.3281	6.29775
NatG12D-2			8.48641	5.41325	8.6737	14.4589	6.22604
NatG12D-2			8.37134	5.40012	8.8686	13.9799	6.1137
NatQ61R-1			7.91698	5.16466	7.86344	14.162	6.12598
NatQ61R-1			8.00883	5.13515	7.8487	14.1991	6.14873
NatQ61R-1			7.95883	5.08996	7.80604	14.33	6.14485
NatQ61R-2			8.44524	5.49248	8.48427	13.9863	5.95886
NatQ61R-2			8.46371	5.43484	8.44737	14.1814	6.03565
NatQ61R-2			8.34355	5.42993	8.55888	14.1626	5.94756
ComG12D-1			7.42825	5.3383	5.81203	14.0016	5.42963
ComG12D-1			7.23195	5.27108	5.76555	14.0793	5.46079
ComG12D-1			7.3427	5.20795	5.70782	13.522	5.35121
ComG12D-2			7.1123	4.9071	7.00532	12.0375	5.61513
ComG12D-2			7.27955	4.62714	6.66923	12.3037	5.5779
ComG12D-2			7.31029	4.71148	6.6488	12.1811	5.42158
ComQ61R-1			7.96886	4.80943	6.99035	12.4074	5.62003
ComQ61R-1			8.08171	4.57858	7.033	12.245	5.62808
ComQ61R-1			7.95304	4.54495	6.91789	12.2295	5.74116
ComQ61R-2			7.71148	3.84839	6.0415	11.2934	5.57118
ComQ61R-2			7.82877	3.66249	5.90772	11.5305	5.59497
ComQ61R-2			7.75066	3.61613	6.08186	11.3718	5.572
		avg control	7.56648	5.5155	6.83391	14.7159	6.8613
			ddct
			cFOS	Dusp6	Egr1	Fosl1	FOSL2
WT-1			0.0213122	0.0834249		-0.0372613	0.197363
WT-1			-0.045006	-0.0329206		0.22241	-0.0267716
WT-1			0.0236938	-0.0505043	-0.336059	-0.185149	-0.170591
WT-2			1.33082	0.627779	14.6324	-1.56519	-0.72011
WT-2			1.2428	0.474779	14.7022	-1.52992	-0.678845
WT-2			1.37544	0.566748	1.25681	-1.78493	-0.771957
NatG12D-1			0.0607937	0.143777	0.0742942	-0.228211	-0.203684
NatG12D-1			0.00204818	-0.112766	0.185381	0.239302	-0.140708
NatG12D-1			-0.0581627	-0.151225	-0.272189	0.230145	-0.176689
NatG12D-2			0.976727	0.137188	1.88033	-0.387783	-0.563545
NatG12D-2			0.91993	-0.102251	1.83979	-0.257065	-0.63526
NatG12D-2			0.804851	-0.115382	2.03469	-0.735984	-0.747598
NatQ61R-1			0.350499	-0.350841	1.02953	-0.553928	-0.735314
NatQ61R-1			0.442342	-0.380349	1.0148	-0.516878	-0.712563
NatQ61R-1			0.392348	-0.425539	0.972133	-0.385936	-0.716452
NatQ61R-2			0.878759	-0.0230175	1.65036	-0.729649	-0.902442
NatQ61R-2			0.897223	-0.0806536	1.61346	-0.534555	-0.825645
NatQ61R-2			0.777067	-0.0855694	1.72497	-0.553308	-0.913739
ComG12D-1			-0.138231	-0.177195	-1.02187	-0.714315	-1.43167
ComG12D-1			-0.334531	-0.244416	-1.06835	-0.636637	-1.40051
ComG12D-1			-0.223788	-0.307548	-1.12609	-1.19397	-1.51009
ComG12D-2			-0.454188	-0.6084	0.171417	-2.67846	-1.24617
ComG12D-2			-0.286938	-0.888353	-0.164675	-2.41218	-1.28339
ComG12D-2			-0.256192	-0.80402	-0.185105	-2.53487	-1.43972
ComQ61R-1			0.402378	-0.706068	0.156446	-2.30855	-1.24127
ComQ61R-1			0.515228	-0.936915	0.199094	-2.47095	-1.23321
ComQ61R-1			0.386561	-0.970547	0.0839814	-2.48644	-1.12014
ComQ61R-2			0.144994	-1.66711	-0.792404	-3.42257	-1.29012
ComQ61R-2			0.262285	-1.85301	-0.926185	-3.18545	-1.26633
ComQ61R-2			0.184178	-1.89937	-0.75205	-3.34411	-1.2893
			2^ddct
			cFOS	Dusp6	Egr1	Fosl1	FOSL2
			0.985336	0.943814	1	1.02616	0.872143
			1.03169	1.02308	1	0.857132	1.01873
			0.983711	1.03563	1.2623	1.13693	1.12552
			0.397541	0.647172	3.93739e-05	2.95916	1.64731
			0.422553	0.719577	3.75153e-05	2.8877	1.60086
			0.385435	0.675137	0.418467	3.44602	1.70758
			0.958737	0.905146	0.949807	1.17138	1.15163
			0.998581	1.0813	0.879417	0.847155	1.10245
			1.04114	1.11051	1.20764	0.852549	1.13029
			0.508131	0.90929	0.271621	1.30838	1.4779
			0.528535	1.07345	0.279362	1.19504	1.55322
			0.572421	1.08326	0.244061	1.66553	1.67899
			0.784313	1.2753	0.489869	1.46808	1.66476
			0.735939	1.30166	0.494898	1.43086	1.63871
			0.761889	1.34307	0.509752	1.30671	1.64314
			0.543835	1.01608	0.318561	1.65824	1.86923
			0.536919	1.0575	0.326814	1.4485	1.77233
			0.583552	1.06111	0.302505	1.46745	1.88392
			1.10055	1.13068	2.03055	1.6407	2.69758
			1.26097	1.18461	2.09704	1.5547	2.63994
			1.1678	1.2376	2.18266	2.28782	2.84827
			1.37001	1.52457	0.88797	6.40173	2.3721
			1.22005	1.85106	1.12091	5.32279	2.43411
			1.19432	1.74596	1.1369	5.79526	2.71268
			0.75661	1.63135	0.897232	4.95385	2.36406
			0.699682	1.91443	0.871098	5.54411	2.3509
			0.764951	1.95958	0.94345	5.60392	2.17368
			0.904383	3.17578	1.73196	10.7225	2.44548
			0.833766	3.61253	1.90024	9.09736	2.40548
			0.88015	3.73051	1.68418	10.155	2.44409
			avg
			cFOS	Dusp6	Egr1	Fosl1	FOSL2
		WT-1	1.00024	1.00084	1.08743	1.00674	1.00546
		WT-2	0.401843	0.680629	0.139515	3.09763	1.65192
		NatG12D-1	0.999486	1.03232	1.01229	0.957029	1.12812
		NatG12D-2	0.536362	1.022	0.265015	1.38965	1.57004
		NatQ61R-1	0.760714	1.30668	0.498173	1.40188	1.64887
		NatQ61R-2	0.554769	1.0449	0.31596	1.52473	1.84183
		ComG12D-1	1.17644	1.1843	2.10342	1.82774	2.7286
		ComG12D-2	1.26146	1.7072	1.04859	5.83993	2.5063
		ComQ61R-1	0.740414	1.83512	0.903927	5.36729	2.29621
		ComQ61R-2	0.872767	3.50627	1.77213	9.9916	2.43168
			stdev
			cFOS	Dusp6	Egr1	Fosl1	FOSL2
		WT-1	0.0272423	0.0497831	0.728769	0.140908	0.127208
		WT-2	0.0189292	0.0365135	0.24158	0.303827	0.0535126
		NatG12D-1	0.0412087	0.111099	0.172801	0.185655	0.0246656
		NatG12D-2	0.0328519	0.0977328	0.018555	0.245548	0.101599
		NatQ61R-1	0.0242085	0.0341628	0.0103381	0.0844971	0.0139379
		NatQ61R-2	0.0251656	0.0250178	0.0123613	0.116011	0.060634
		ComG12D-1	0.0805551	0.0534605	0.0762531	0.400752	0.107571
		ComG12D-2	0.0948838	0.166663	0.139334	0.540854	0.181404
		ComQ61R-1	0.0355208	0.177908	0.0366379	0.359301	0.106323
		ComQ61R-2	0.0358828	0.292229	0.113493	0.824786	0.0226997
