# Supplementary material for: Genetically manipulating endogenous Kras levels and oncogenic mutations in vivo influences tissue patterning of murine tumorigenesis
Source: eLife. 2022 Sep 7;11:e75715. doi: 10.7554/eLife.75715 (PMC9451540; doi:10.7554/eLife.75715)
Supplement: Figure 1—source data 6. — Sequence alignment of the codons in the coding exons 1 to 3 of the indicated KrasLSL alleles in comparison to the murine wild-type sequence (Kras). Top: amino acid sequence. Red nucleotides: optimized codons. Green highlight: G12D mutation. Blue highlight: Q61R mutation. [file elife-75715-fig1-data6.xlsx]

## Sheet: Sheet1
	M	T	E	Y	K	L	V	V	V	G	A	G	G	V	G	K	S	A	L	T
Kras	ATG	ACT	GAG	TAT	AAA	CTT	GTG	GTG	GTT	GGA	GCT	GGT	GGC	GTA	GGC	AAG	AGC	GCC	TTG	ACG	60
natG12D	ATG	ACT	GAG	TAT	AAA	CTT	GTG	GTG	GTT	GGA	GCT	GAT	GGC	GTA	GGC	AAG	AGC	GCC	TTG	ACG	60
natQ61R	ATG	ACT	GAG	TAT	AAA	CTT	GTG	GTG	GTT	GGA	GCT	GGT	GGC	GTA	GGC	AAG	AGC	GCC	TTG	ACG	60
comG12D	ATG	ACC	GAG	TAC	AAG	CTG	GTG	GTG	GTG	GGC	GCC	GAC	GGC	GTG	GGC	AAG	AGC	GCC	CTG	ACC	60
comQ61R	ATG	ACC	GAG	TAC	AAG	CTG	GTG	GTG	GTG	GGC	GCC	GGT	GGC	GTG	GGC	AAG	AGC	GCC	CTG	ACC	60
	***	**	***	**	**	**	***	***	**	**	**	*	***	**	***	***	***	***	**	**
	I	Q	L	I	Q	N	H	F	V	D	E	Y	D	P	T	I	E	D	S	Y
Kras	ATA	CAG	CTA	ATT	CAG	AAT	CAC	TTT	GTG	GAT	GAG	TAT	GAC	CCT	ACG	ATA	GAG	GAC	TCC	TAC	120
natG12D	ATA	CAG	CTA	ATT	CAG	AAT	CAC	TTT	GTG	GAT	GAG	TAC	GAC	CCT	ACG	ATA	GAG	GAC	TCC	TAC	120
natQ61R	ATA	CAG	CTA	ATT	CAG	AAT	CAC	TTT	GTG	GAT	GAG	TAC	GAC	CCT	ACG	ATA	GAG	GAC	TCC	TAC	120
comG12D	ATC	CAG	CTG	ATC	CAG	AAC	CAC	TTC	GTG	GAC	GAG	TAC	GAC	CCT	ACC	ATC	GAG	GAC	AGC	TAC	120
comQ61R	ATC	CAG	CTG	ATC	CAG	AAC	CAC	TTC	GTG	GAC	GAG	TAC	GAC	CCT	ACC	ATC	GAG	GAC	AGC	TAC	120
	**	***	**	**	***	**	***	**	***	**	***	**	***	***	**	**	***	***	*	***
	R	K	Q	V	V	I	D	G	E	T	C	L	L	D	I	L	D	T	A	G
Kras	AGG	AAA	CAA	GTA	GTA	ATT	GAT	GGA	GAA	ACC	TGT	CTC	TTG	GAT	ATT	CTC	GAC	ACA	GCA	GGT	180
natG12D	AGG	AAA	CAA	GTA	GTA	ATT	GAT	GGA	GAA	ACC	TGT	CTC	TTG	GAT	ATT	CTC	GAC	ACA	GCA	GGT	180
natQ61R	AGG	AAA	CAA	GTA	GTA	ATT	GAT	GGA	GAA	ACC	TGT	CTC	TTG	GAT	ATT	CTC	GAC	ACA	GCA	GGT	180
comG12D	AGG	AAG	CAG	GTG	GTG	ATC	GAC	GGC	GAG	ACC	TGC	CTG	CTG	GAC	ATC	CTG	GAC	ACC	GCC	GGC	180
comQ61R	AGG	AAG	CAG	GTG	GTG	ATC	GAC	GGC	GAG	ACC	TGC	CTG	CTG	GAC	ATC	CTG	GAC	ACC	GCC	GGC	180
	***	**	**	**	**	**	**	**	**	***	**	**	**	**	**	**	***	**	**	**
	Q	E	E	Y	S	A	M	R	D	Q	Y	M	R	T	G	E	G	F	L	C
Kras	CAA	GAG	GAG	TAC	AGT	GCA	ATG	AGG	GAC	CAG	TAC	ATG	AGA	ACT	GGG	GAG	GGC	TTT	CTT	TGT	240
natG12D	CAA	GAG	GAG	TAC	AGT	GCA	ATG	AGG	GAC	CAG	TAC	ATG	AGA	ACT	GGG	GAG	GGC	TTT	CTT	TGT	240
natQ61R	CGG	GAG	GAG	TAC	AGT	GCA	ATG	AGG	GAC	CAG	TAC	ATG	AGA	ACT	GGG	GAG	GGC	TTT	CTT	TGT	240
comG12D	CAG	GAG	GAG	TAC	AGC	GCC	ATG	AGG	GAC	CAG	TAC	ATG	AGG	ACC	GGC	GAG	GGC	TTC	CTG	TGC	240
comQ61R	CGG	GAG	GAG	TAC	AGC	GCC	ATG	AGG	GAC	CAG	TAC	ATG	AGG	ACC	GGC	GAG	GGC	TTC	CTG	TGC	240
	*	***	***	***	**	**	***	***	***	***	***	***	**	**	**	***	***	**	**	**
	V	F	A	I	N	N	T	K	S	F	E	D	I	H	H	Y	R	E	Q	I
Kras	GTA	TTT	GCC	ATA	AAT	AAT	ACT	AAA	TCA	TTT	GAA	GAT	ATT	CAC	CAT	TAT	AGA	GAA	CAA	ATT	300
natG12D	GTA	TTT	GCC	ATA	AAT	AAT	ACT	AAA	TCA	TTT	GAA	GAT	ATT	CAC	CAT	TAT	AGA	GAA	CAA	ATT	300
natQ61R	GTA	TTT	GCC	ATA	AAT	AAT	ACT	AAA	TCA	TTT	GAA	GAT	ATT	CAC	CAT	TAT	AGA	GAA	CAA	ATT	300
comG12D	GTG	TTC	GCC	ATC	AAC	AAC	ACC	AAG	AGC	TTC	GAG	GAC	ATC	CAC	CAC	TAC	AGG	GAG	CAG	ATC	300
comQ61R	GTG	TTC	GCC	ATC	AAC	AAC	ACC	AAG	AGC	TTC	GAG	GAC	ATC	CAC	CAC	TAC	AGG	GAG	CAG	ATC	300
	**	**	***	**	**	**	**	**		**	**	**	**	***	**	**	**	**	**	**
	K	R	V	K	D	S	E	D	V	P	M	V	L	V	G	N	K	C	D	L
Kras	AAA	AGA	GTA	AAG	GAC	TCT	GAA	GAT	GTG	CCT	ATG	GTC	CTG	GTA	GGG	AAT	AAG	TGT	GAT	TTG	360
natG12D	AAA	AGA	GTA	AAG	GAC	TCT	GAA	GAT	GTG	CCT	ATG	GTC	CTG	GTA	GGG	AAT	AAG	TGT	GAT	TTG	360
natQ61R	AAA	AGA	GTA	AAG	GAC	TCT	GAA	GAT	GTG	CCT	ATG	GTC	CTG	GTA	GGG	AAT	AAG	TGT	GAT	TTG	360
comG12D	AAG	AGG	GTG	AAG	GAC	AGC	GAG	GAC	GTG	CCT	ATG	GTG	CTG	GTG	GGC	AAC	AAG	TGC	GAC	CTG	360
comQ61R	AAG	AGG	GTG	AAG	GAC	AGC	GAG	GAC	GTG	CCT	ATG	GTG	CTG	GTG	GGC	AAC	AAG	TGC	GAC	CTG	360
	**	**	**	***	***		**	**	***	***	***	**	***	**	**	**	***	**	**	**
	P	S	R	T	V	D	T	K	Q	A	Q	E	L	A	R	S	Y	G	I	P
Kras	CCT	TCT	AGA	ACA	GTA	GAC	ACG	AAA	CAG	GCT	CAG	GAG	TTA	GCA	AGG	AGT	TAC	GGG	ATT	CCG	420
natG12D	CCT	TCT	AGA	ACA	GTA	GAC	ACG	AAA	CAG	GCT	CAG	GAG	TTA	GCA	AGG	AGT	TAC	GGG	ATT	CCG	420
natQ61R	CCT	TCT	AGA	ACA	GTA	GAC	ACG	AAA	CAG	GCT	CAG	GAG	TTA	GCA	AGG	AGT	TAC	GGG	ATT	CCG	420
comG12D	CCT	AGC	AGG	ACC	GTG	GAC	ACC	AAG	CAG	GCC	CAG	GAG	CTG	GCC	AGG	AGC	TAC	GGC	ATC	CCT	420
comQ61R	CCT	AGC	AGG	ACC	GTG	GAC	ACC	AAG	CAG	GCC	CAG	GAG	CTG	GCC	AGG	AGC	TAC	GGC	ATC	CCT	420
	***		**	**	**	***	**	**	***	**	***	***	*	**	***	**	***	**	**	**
	F	I	E	T	S	A	K	T	R	Q	G	V	D	D	A	F	Y	T	L	V
Kras	TTC	ATT	GAG	ACC	TCA	GCA	AAG	ACA	AGA	CAG	GGT	GTT	GAC	GAT	GCC	TTC	TAT	ACA	TTA	GTC	480
natG12D	TTC	ATT	GAG	ACC	TCA	GCA	AAG	ACA	AGA	CAG	GGT	GTT	GAC	GAT	GCC	TTC	TAT	ACA	TTA	GTC	480
natQ61R	TTC	ATT	GAG	ACC	TCA	GCA	AAG	ACA	AGA	CAG	GGT	GTT	GAC	GAT	GCC	TTC	TAT	ACA	TTA	GTC	480
comG12D	TTC	ATC	GAG	ACC	AGC	GCC	AAG	ACC	AGG	CAG	GGT	GTT	GAC	GAT	GCC	TTC	TAT	ACA	TTA	GTC	480
comQ61R	TTC	ATC	GAG	ACC	AGC	GCC	AAG	ACC	AGG	CAG	GGT	GTT	GAC	GAT	GCC	TTC	TAT	ACA	TTA	GTC	480
	***	**	***	***		**	***	**	**	***	***	***	***	***	***	***	***	***	***	***
	R	E	I	R	K	H	K	E	K	M	S	K	D	G	K	K	K	K	K	K
Kras	CGA	GAA	ATT	CGA	AAA	CAT	AAA	GAA	AAG	ATG	AGC	AAA	GAT	GGG	AAG	AAG	AAG	AAG	AAG	AAG	540
natG12D	CGA	GAA	ATT	CGA	AAA	CAT	AAA	GAA	AAG	ATG	AGC	AAA	GAT	GGG	AAG	AAG	AAG	AAG	AAG	AAG	540
natQ61R	CGA	GAA	ATT	CGA	AAA	CAT	AAA	GAA	AAG	ATG	AGC	AAA	GAT	GGG	AAG	AAG	AAG	AAG	AAG	AAG	540
comG12D	CGA	GAA	ATT	CGA	AAA	CAT	AAA	GAA	AAG	ATG	AGC	AAA	GAT	GGG	AAG	AAG	AAG	AAG	AAG	AAG	540
comQ61R	CGA	GAA	ATT	CGA	AAA	CAT	AAA	GAA	AAG	ATG	AGC	AAA	GAT	GGG	AAG	AAG	AAG	AAG	AAG	AAG	540
	***	***	***	***	***	***	***	***	***	***	***	***	***	***	***	***	***	***	***	***
	S	R	T	R	C	T	V	M	-
Kras	TCA	AGG	ACA	AGG	TGT	ACA	GTT	ATG	TGA	567
natG12D	TCA	AGG	ACA	AGG	TGT	ACA	GTT	ATG	TGA	567
natQ61R	TCA	AGG	ACA	AGG	TGT	ACA	GTT	ATG	TGA	567
comG12D	TCA	AGG	ACA	AGG	TGT	ACA	GTT	ATG	TGA	567
comQ61R	TCA	AGG	ACA	AGG	TGT	ACA	GTT	ATG	TGA	567
	***	***	***	***	***	***	***	***	***

## Sheet: Sheet2
M	T	E	Y	K	L	V	V	V	G	A	G	G	V	G	K	S	A	L	T
I	Q	L	I	Q	N	H	F	V	D	E	Y	D	P	T	I	E	D	S	Y
R	K	Q	V	V	I	D	G	E	T	C	L	L	D	I	L	D	T	A	G
Q	E	E	Y	S	A	M	R	D	Q	Y	M	R	T	G	E	G	F	L	C
V	F	A	I	N	N	T	K	S	F	E	D	I	H	H	Y	R	E	Q	I
K	R	V	K	D	S	E	D	V	P	M	V	L	V	G	N	K	C	D	L
P	S	R	T	V	D	T	K	Q	A	Q	E	L	A	R	S	Y	G	I	P
F	I	E	T	S	A	K	T	R	Q	G	V	D	D	A	F	Y	T	L	V
R	E	I	R	K	H	K	E	K	M	S	K	D	G	K	K	K	K	K	K
S	R	T	R	C	T	V	M
