# Supplementary material for: Genetically manipulating endogenous Kras levels and oncogenic mutations in vivo influences tissue patterning of murine tumorigenesis
Source: eLife. 2022 Sep 7;11:e75715. doi: 10.7554/eLife.75715 (PMC9451540; doi:10.7554/eLife.75715)
Supplement: Figure 3—source data 1. [file elife-75715-fig3-data1.xlsx]

## Sheet: Sheet1
genename	KrasLSL-natG12D/+	KrasLSL-natQ61R/+	KrasLSL-comG12D/+	KrasLSL-comQ61R/+
Krt4	-10.9205	-10.0625	-8.08328	-9.25442
Krt13	-9.67898	-10.0481	-9.75551	-10.5014
Lor	-8.80477	-7.80442	-9.5397	-8.3383
Serpinb12	-6.44895	-7.20494	-5.46259	-5.14272
Atp2a1	-4.49954		-4.43516	-5.26227
Trim10	2.31986		2.38969
Gm15459	4.6761	5.40358	5.30779	4.91445
1100001G20Rik				2.75517
1300002K09Rik				2.25465
1700003F12Rik				2.93916
1700003F17Rik				-2.14384
1700006J14Rik				4.17983
1700020L24Rik				2.7861
2010005H15Rik				8.45238
2610027K06Rik				-2.0715
4833423E24Rik				-2.75026
4930405A21Rik				-2.21658
4930430E12Rik				3.11329
4930438A08Rik				8.4023
4930511M06Rik				-3.30267
4930539E08Rik				2.20546
4931403E22Rik				-2.13389
5430421N21Rik				4.20237
5830444B04Rik				-2.0668
5930412G12Rik				-2.79865
9230111E07Rik				2.38759
9530048J24Rik				-2.27633
9530051G07Rik				-2.23286
9830107B12Rik				3.44679
9930013L23Rik				-2.07046
A430104N18Rik				2.11156
A530016L24Rik				-3.33754
A530032D15Rik				2.72495
A530064D06Rik				3.88605
A530076I17Rik				2.89444
AA467197				3.53644
Aadac				-3.52227
Aard				-2.11323
Abca13				3.15644
Abcc2				2.3148
AC092404.1				3.07092
AC108833.1				3.96717
AC123702.1				2.29982
AC123702.2				2.14852
AC127583.1				5.60462
AC132347.1				-3.38136
AC137902.1				2.02541
AC140333.1				4.63835
AC153382.1				4.29329
AC161812.1				-2.49504
AC163623.1				2.01693
Acan			3.87313
Acta1				-9.6287
Actc1				-2.34607
Actg2				-2.23534
Actn3			-2.77736
Actn3				-3.41793
Ada				-2.7113
Adam12				-2.27133
Adam8				3.22173
Adamts4				-2.09383
Adcyap1				8.10043
Adipoq				-2.14134
Adm2				3.07329
Adrb3				-2.37762
Aipl1				2.82069
AL607123.1				-2.3475
AL670236.1				-2.18901
AL691505.1				2.11869
Aldh3b2				-3.53949
Alox5ap				2.22062
Amer2				3.21817
Amica1				2.61115
Amph				-2.16014
Angpt4				-2.23627
Angptl7			2.13548
Ankrd22				3.98671
Ankrd63			-2.37391
Ano2				-2.33506
Ano3				-2.51373
Ano5				-3.27727
Aoc3				-2.31588
Apln				-3.50929
Aplnr				-2.24369
Apobec2				-2.57443
Apod				2.66069
Apol10b				-2.00441
Apol7c				-2.6949
Apold1			2.05306
Aqp9				3.71355
Areg				2.85037
Arg1				3.9376
Arg2				2.28075
Arl11				2.21664
Arsi				-2.74585
Atp13a5				3.14978
Atp1a3				2.4822
Atp6v0a4				2.21588
Awat1				5.00247
B130024G19Rik				-2.09614
B430306N03Rik				3.84855
BC002163		3.72126	3.26667	2.18044
BC018473			11.4703
BC024582				2.73711
BC030500				2.31647
BC048546				2.01489
BC100530			2.71194	9.74517
BC117090				9.26847
Bcan				-2.68758
Bcl2l15				3.64921
Best3				-2.56725
Bex6				2.10658
Bhlhe41				2.05635
Bmper				-2.39731
Btbd17				2.19262
Btnl10				6.7371
C1qtnf3				-2.52323
C430049B03Rik				-2.33547
C87198				2.25727
Calca				2.20046
Calml3				-2.71537
Calr4				2.98423
Camp			4.1522	8.78777
Car3				-2.70016
Casq1				-2.65774
Ccdc42				-2.23224
Ccdc63				3.43121
Ccl19				-2.0855
Ccl3				3.81815
Ccl4				2.21111
Ccl6				2.11082
Ccl9				2.47477
Ccr1				3.77423
Ccrl1				-2.57678
Cd14				2.65267
Cd164l2				3.00396
Cd177				4.27727
Cd200r2				4.34712
Cd200r3				2.43978
Cd209g				-2.34932
Cd300lf				3.14572
Cd33				3.20608
Cd5l			2.03541
Cdh17				3.0427
Cdh2				-2.05327
Cdsn			-4.11014	-4.94379
Ceacam10				4.38836
Ceacam16				3.4884
Cebpe				4.19878
Cela1				2.48632
Celsr3				2.68052
Chi3l3				2.60519
Chi3l4				5.39157
Chi3l7				2.28416
Chrm1				-2.03741
Chrna7				-2.16178
Chst13				3.75309
Ckm				-3.32147
Clca5				-3.89459
Clcnka				3.41145
Cldn2				4.01055
Cldn4				2.46629
Clec4d				3.53229
Clec5a				4.41175
Clu				2.11333
Cma1				-2.21909
Cml3				-2.05382
Cnn1				-2.10789
Cntn1				-2.37173
Cntn4				-2.52508
Col10a1			3.84611
Col12a1				-2.00096
Col13a1				-2.49545
Col17a1				-2.9296
Col2a1			5.15631
Col6a3				-2.42803
Col9a1				4.75684
Colec10				-2.51136
Colq				-4.41915
Corin				2.00412
Cox8b				-2.43733
Cpa3				3.01877
Cpne2				2.28196
Crabp1				-4.19684
Crb1				-2.53204
Crtac1				4.23454
Csf3r				2.58353
CT033785.1				-2.41716
Ctrl				-3.69339
Ctse				2.45236
Ctsg			6.53497	10.891
Ctsk				3.50258
Cttnbp2				-2.1148
Ctxn3				-2.40594
Cxcl10				-2.68631
Cxcl17				2.02298
Cxcl2				5.94891
Cxcl3				4.51217
Cxcr1				3.09755
Cxcr2				3.63515
Cyp11a1				2.70394
Cyp2c44				-2.12979
Cyp3a11				-5.48999
Cyp4f18				2.28228
D030018L15Rik				-2.28103
D430019H16Rik				-2.44926
D630029K05Rik				-2.47136
D930028M14Rik				3.84641
Darc				3.37503
Dbp			2.45858	2.51921
Ddc				-2.27621
Des				-2.001
Dfna5				3.71692
Dgkb				-2.1777
Dhrs9				3.23771
Disp2				-2.77232
Dlk1				12.1186
Dmbt1				8.07379
Dnajc22				2.09241
Doc2b				2.2542
Dok3				2.05725
Dpep3				3.86333
Dppa2				-4.34435
Dpt				-2.06076
Dsc3				-4.2573
DUSP12				2.05415
E030013I19Rik				-3.28243
Ear11				6.02394
Ear6				5.24429
Egr3			2.23493
Eif5al3-ps			3.90743
Elane			4.84579	10.1679
Elovl4			-2.71552	-3.45735
Emid1				-2.32794
Emilin2				2.23723
Epb4.2			2.03026
Ephb1				-2.10667
Ephx3			-2.05559	-2.91297
Epx			4.5194	8.15005
Ereg				4.81228
Ermap				2.07834
Etv4			2.43948	3.46978
F13a1				2.24205
F5				2.35549
F630028O10Rik				4.9351
F730016J06Rik				2.05742
F730035M05Rik				4.6188
F830208F22Rik				2.31123
Fabp7				3.73438
Faim2				-2.20392
Fam101a				-3.09574
Fam124b				-2.06231
Fam151a				-3.14391
Fam178b				-2.04025
Fam189a1				-2.18445
Fam19a1				-2.48814
Fam19a3				-2.20754
Fam25c		-6.14616	-5.61452	-5.10694
Fam65b				2.64741
Fbn2				-2.02036
Fbp1				2.3227
Fcer1a				3.00929
Fcgr3				2.11223
Fcgr4				2.05389
Fcnb				7.49541
Fcrlb				2.40007
Fetub				2.5602
Fga				4.25745
Fgfr4				-2.6244
Fgg				3.4533
Fgl1				2.72028
Fmo4				2.08542
Fosl1				2.43484
Foxd4				3.1401
Foxf2				-2.14007
Foxred2				2.8412
Fut2				2.37227
Fxyd4				2.62792
Fzd10				-2.82404
G530011O06Rik				-2.42168
Gabra4				-4.22925
Gad1-ps				3.76202
Gap43				-3.05363
Gata1				2.40814
Gbp10				-3.50109
Gcnt1				2.38525
Gcnt3				4.53964
Gcnt4				4.07157
Gfi1b				2.23773
Gif				-2.72022
Gja3				4.90502
Gjb4				4.27146
Gjc2				-2.68104
Gkn2				8.56924
Glb1l3				-2.36946
Glrb				-2.6034
Gm10036				3.15785
Gm10392				2.06446
Gm11425				2.37412
Gm11469				2.21734
Gm11476				-2.85428
Gm11627				-2.1609
Gm11652				2.23032
Gm11714				5.85976
Gm11816				-2.75763
Gm11827				2.1189
Gm12233				2.70717
Gm12248				4.87851
Gm12589				4.08657
Gm12596				3.81412
Gm13152				-2.03051
Gm13387				-2.46392
Gm13688				-3.35605
Gm13749				-3.37468
Gm13816				-2.71015
Gm13822				3.4332
Gm14010				6.45305
Gm14097				-2.02767
Gm14207				-2.28069
Gm14267				3.25531
Gm14328			-4.31055	-2.9255
Gm14548				4.23844
Gm14569				-2.3541
Gm14703				2.12751
Gm15396				2.05032
Gm15448				2.15013
Gm15453				2.09563
Gm15609				-2.30239
Gm15663				-2.17102
Gm15697				-2.47813
Gm15729				3.49259
Gm15784				-2.31772
Gm15832				2.13801
Gm15851				-3.06681
Gm15899				2.65835
Gm15922				2.74774
Gm15925				2.73385
Gm16096				2.24022
Gm16141				-2.08112
Gm16251			-4.57914
Gm16263				-3.04227
Gm16340				-2.42974
Gm16372				4.92639
Gm16485				-2.43193
Gm16556				2.62966
Gm16564				-3.05859
Gm16567				-2.59123
Gm17334				-2.13927
Gm1840			-2.02589
Gm18594				-4.58627
Gm20419				4.43251
Gm20684				2.39312
Gm20703				4.37801
Gm21807				-2.04483
Gm22107				2.60265
Gm22637				-3.14386
Gm24562				3.83966
Gm25117				-2.28745
Gm4841				-2.07314
Gm5294				7.189
Gm5416				7.41825
Gm5483			2.39432	8.49075
Gm5560				2.31365
Gm5874				3.56475
Gm6166			-5.32015	-5.14442
Gm6583				2.10156
Gm6685				-3.59201
Gm6733		3.33846	2.89009	2.63294
Gm7110				-3.15207
Gm7125				3.48457
Gm7809				-2.83694
Gm8091				3.30836
Gm830				-2.48217
Gm8494		3.82223	3.27804
Gm9025				2.54181
Gp1ba				2.16344
Gp2				3.33275
Gp49a				2.36059
Gp5				2.03404
Gpnmb				3.31347
Gpr141				2.52767
Grm1				3.73313
Grpr				3.36295
Gsg1l				-3.37822
Gucy1a2				-2.18389
Gxylt2				-2.07844
Gypa			2.3312
Gzma				-2.50199
H19				-3.60636
H2-Bl				2.67996
H2-Q10				2.95839
H60b				3.04531
Hal				4.17782
Has2				-2.15297
Hcn1				-2.20838
Hecw1				3.06645
Hist1h3e			2.20858	2.24205
Hk3				3.07285
Hmga2				4.89271
Hnf4a				3.54274
Hrh2				2.36697
Hrk				4.73311
Hsph1				-2.04996
Htra4				2.0275
Ido1				-2.39131
Ifitm6				3.74309
Igf2bp3				2.97765
Ighg1			2.09637
Ighg2b			2.24516
Ighg2c			2.62885	2.05743
Ighv1-14				2.20174
Ighv1-42				3.58341
Ighv1-72				2.35044
Ighv11-2				4.47137
Ighv14-4				2.46032
Ighv5-12				3.34208
Igkv14-126				3.84533
Igkv4-50				2.37843
Igkv4-74			3.22091
Igkv6-20			3.04524
Igkv6-25		-3.03094
Igsf10				-2.27929
Il18rap				2.60148
Il1f9				3.2057
Il1r2				5.24792
Il23a				2.74415
Inhba				2.28742
Insrr				-2.10094
Itga2b				2.05431
Itga8				-2.15056
Itgam				3.25313
Itgb1bp2				-2.21775
Itgb2l			3.85353	8.11598
Itih2				2.75052
Itln1				4.38673
Izumo1				-2.13456
Jph2				-2.18647
Kcna2				-2.51387
Kcng4				-2.28752
Kcnip1				2.67628
Kcnt1				3.83439
Kel			2.63336	2.45115
Klb				-3.35026
Klhl31				-2.90539
Klhl41				-2.25568
Klhl6				2.00801
Klra17				2.01546
Klra7			2.14884
Kng2				5.04702
Krt14				-3.98573
Krt20				3.22138
Krt5				-4.61225
Krt78				-3.68897
Krt86				4.0467
Lat2				2.64989
Lcn2				2.57416
Lctl				-4.09464
Lgals7				-4.46938
Lilra6				3.96607
Lilrb4				2.06209
Lin28a				6.18571
Lmod3				-2.56588
Lrrc3b				-2.83943
Lrrc4c				-2.11272
Lrtm1				-3.50002
Ltb4r1				2.55383
Ltf				4.22596
Ly6c2				3.27823
Ly6f				6.91452
Ly6g			3.39452	7.67569
Map3k7cl				-2.15743
Mapk13				2.03264
Matk				2.63492
Mb				-2.40929
Mc5r				2.76098
Mcpt8			4.26215	7.73963
Meg3				3.12004
Mfap4				-2.91518
Mfi2			7.35784	8.75506
Mgam				2.46354
Miat				-2.14607
Milr1				2.11878
Mir142				2.87213
Mirg				2.74607
Mmp13				2.07847
Mmp25				3.80865
Mmp8				4.5236
Mmp9				5.92794
Mpo		3.67053	5.69984	9.49978
Mpp4				-2.18449
Mrgpra2b				3.04364
Ms4a2				3.85885
Ms4a3			5.69605	10.384
mt-Ti				-2.34976
mt-Tt				2.46249
Muc13				4.01586
Mxd1				2.69906
Mybpc2				-2.17322
Myh1				-8.71644
Myl1				-4.17803
Myl2				5.65636
Myl3				-2.7378
Mylk2				-2.02466
Mylpf			-3.37793	-3.13915
Mypn				-2.54512
Naip1				2.14678
Nccrp1				-2.20464
Ncf1				2.00804
Ndst3				-3.01798
Ndufa4l2				-2.27576
Neb			-2.87099	-2.50315
Negr1				-2.12954
Nfasc				2.923
Nfe2				2.81009
Ngp			3.77838	8.34009
Niacr1				2.19417
Nipal4				-3.61437
Nkpd1				-2.68082
Nlrp12				2.15818
Nlrp3				2.54537
Nos1				-2.55186
Nos2				-2.90849
Npbwr1				3.63564
Npffr2				-4.30961
Npm3-ps1		-3.99897		-3.09766
Nppa			3.46654
Npy2r			6.40561	3.65731
Npy2r				5.11252
Nrcam				-2.57823
Nrep				-2.26344
Olfm4				5.18984
Olfr1033				-2.34172
Olfr550				-3.16492
Onecut2				3.32839
Orm1				3.25897
Orm3				2.16386
Ovgp1				2.74517
Pabpc1l				2.86849
Pabpc4l				-2.1248
Padi4				3.33189
Pbld1				2.04647
Pcdh12				-2.37077
Pcdhb19				-2.15028
Pck1				-2.53117
Pcolce2				-2.23138
Pde4c				2.13163
Pde5a				-2.38961
Pglyrp1				2.30994
Pgr				-2.00839
Pira2				2.72161
Pitx1				-4.07798
Piwil2				3.50807
Pkd1l2				7.08101
Pkp1		-10.2669	-7.29352
Pla2g7				2.67472
Plcd4				-2.20887
Plekhs1				2.42509
Plin1				-2.22197
Pnpla3				-2.67189
Postn				-2.40487
Ppp3r2				2.31594
Prg2		2.37966	3.8535	8.28627
Prg3				5.15118
Prnd				-3.70429
Prss16				3.01559
Prss22				4.61981
Prss34			2.77987	7.25573
Prss35				2.00655
Prtn3				4.83412
Pstpip1				2.57022
Ptafr				2.1055
Pthlh				2.17453
Ptpn5				-2.24152
Ptprn				3.50258
Ptprn2				2.89682
Pydc3				-2.02996
Pydc4				-2.13029
Pygm				-2.27659
Rab6b				-2.3564
Raet1d				5.8708
Raet1e				2.2613
Rag1			4.84688	6.22088
Rap1gap				2.0875
Rasgrp3				-2.17749
Rasl10b				2.69457
Rbp7			2.90938	2.75484
Rdh1				2.94757
Rdh12				4.3139
Rdh9				2.19803
Retnla				3.47541
Retnlb				5.63614
Retnlg				6.05956
Rgs1				3.40559
Rgs14				2.19923
Rgs16				2.45054
Rgs18				2.53844
Rhag				3.67605
Rhbdl2				2.83243
Rhd				2.92042
Rian				2.48807
Robo2				-2.21347
RP24-323K23.2				-2.76993
RP24-547D11.3				3.09396
RP24-96N12.1				-2.61253
Rph3a			5.12324	6.93171
Rpl13-ps1				3.69691
Rpl31-ps15				-2.51108
Rprml				-3.03361
Rptn			-3.80746	-5.59969
Rspo2				-3.12701
Rspo4				-2.53148
Rtp3				-2.26218
S100a8				5.52169
S100a9				5.2839
Sall1			-2.36342	-2.81883
Samd12				-2.41364
Sbspon				-2.33752
Scn2a1				-2.2114
Scn3a				-3.1067
Scn3b				-2.3161
Scn7a				-2.07267
Scrg1				2.61938
Scube2				-2.69743
Sectm1a				4.19962
Sectm1b				4.18705
Sell				2.74914
Serpind1				2.25961
Serpinh1				-2.09011
Sh2d1b2				2.9008
Sh2d5				4.94829
Sirpb1b				2.20179
Sirpb1c				2.10868
Slc12a3				2.30948
Slc16a3				2.13837
Slc1a6				-2.56255
Slc22a4				2.44321
Slc25a48				2.18166
Slc26a10				-2.78167
Slc2a3				2.66852
Slc38a5				-3.4141
Slc4a1			2.09613
Slc6a13				3.82713
Slc7a10				-4.28033
Slc7a11				2.54545
Slc7a5				2.00929
Slc8a3				-2.59617
Slco1a4				3.38676
Slco5a1				-2.38394
Slfn1				3.52271
Slfn10-ps				2.18172
Slfn14			3.0252	3.07039
Slfn4				4.22528
Smarca1				-2.06721
Snai2				-2.07961
Snx31				-2.54141
Sost				-2.01445
Sox11				-2.89264
Spag11b				3.47615
Spata31d1a				3.58447
Spon2				-3.37542
Spp1				3.17217
Sstr3				2.28478
Sstr4				-2.50959
St8sia6				2.92497
Stfa1				8.22158
Stfa2			3.70517	11.0749
Stfa2l1			2.10348	7.63952
Stfa3				10.4461
Stoml3			2.31183
Sync				-2.44303
Sypl2				-4.36576
Tarm1				2.73269
Tat				2.13512
Tbxa2r				-2.16611
Tcf21				-2.53997
Tdo2				2.49126
Tfpi2				-2.06307
Tgm3		-4.81853		-4.47606
Them5			-3.639
Thrsp				-2.7231
Tlr13				2.95278
Tmeff2				-2.05189
Tmem156				2.02545
Tmem200a				-2.69919
Tmem213				3.08798
Tmem233				-3.35641
Tmem40				2.31049
Tmem45b				-2.56939
Tmigd1				-3.06123
Tnc				-2.6709
Tnfrsf19				-2.00901
Tnfrsf23				2.37553
Tnfrsf26				2.57709
Tnnt3				-3.81051
Tpsb2				-2.00114
Trem1				3.59283
Trem2				2.07293
Trem3				3.0021
Treml2				2.41477
Trim30b				3.02364
Trim30b				3.01354
Trim58				2.433
Trim71				-2.31743
Trim9				3.74938
Trpm2				2.58297
Trpv3				-3.43002
Tubb4a				-2.62832
Unc5c				-2.41997
Unc5d				-2.94738
Unc80				-2.13062
Upk3a				-2.33233
Upk3bl				3.08715
Vsig1				3.7846
Vsnl1				-2.36448
Vstm2b				-2.36737
Vtn				-2.29574
Wfdc12				-2.71706
Wfdc16				-3.8788
Wfdc17				2.17867
Wfdc5				-2.22905
Wisp1				-2.30758
Wnt6				-3.1777
Xirp2				-3.22015
Xpnpep2				-2.92758
Yipf7				-2.42611
Ypel4				2.6539
Zbtb16			-2.98491
Zcchc5				-2.51112
Zfp114				-2.3468
Zfp663				-2.5721
