# Supplementary material for: Genetically manipulating endogenous Kras levels and oncogenic mutations in vivo influences tissue patterning of murine tumorigenesis
Source: eLife. 2022 Sep 7;11:e75715. doi: 10.7554/eLife.75715 (PMC9451540; doi:10.7554/eLife.75715)
Supplement: Figure 3—source data 2. [file elife-75715-fig3-data2.xlsx]

## Sheet: HALLMARK
HALLMARK	KrasLSL-natG12D/+	KrasLSL-natQ61R/+	KrasLSL-comG12D/+	KrasLSL-comQ61R/+
REACTIVE_OXIGEN_SPECIES_PATHWAY			1.82118	2.29524
MTORC1_SIGNALING			1.74462	2.06285
OXIDATIVE_PHOSPHORYLATION			2.85001	1.94586
XENOBIOTIC_METABOLISM			1.66294	1.5924
PEROXISOME			1.72473	1.50309
GLYCOLYSIS			1.89408	1.4742
UV_RESPONSE_UP			1.45415	1.44583
E2F_TARGETS			2.73598	1.40295
HEDGEHOG_SIGNALING			-1.69301	-1.61059
UV_RESPONSE_DN			-2.05707	-1.8345
MYC_TARGETS_V1	-1.65469		2.32274	1.87198
MYC_TARGETS_V2	-1.73965		1.7214	1.42879
APICAL_JUNCTION	-1.6336		-1.60585	-1.87425
TNFA_SIGNALING_VIA_NFKB	-2.0589	1.59525	1.56407	1.8072
HEME_METABOLISM	0.43458	2.09197	1.56382	1.77612
MYOGENESIS	-2.21145	-1.61941	-1.96113	-2.33157
IL6_JAK_STAT3_SIGNALING	-2.52006	-1.58103		1.63231
INFLAMMATORY_RESPONSE	-2.23608	-1.49537		1.5415
APOPTOSIS	-1.50411			1.53291
PI3K_AKT_MTOR_SIGNALING	-1.70511			1.42242
KRAS_SIGNALING_UP	-1.93185	-1.44656
ALLOGRAFT_REJECTION	-2.79617	-2.02967		1.48022
INTERFERON_GAMMA_RESPONSE	-2.16859	-2.17254		-1.51625
INTERFERON_ALPHA_RESPONSE	-1.65076	-2.12053		-1.79037
EPITHELIAL_MESENCHYMAL_TRANSITION	-1.95671	-1.49183		-2.62213
P53_PATHWAY		1.50374		2.13291
DNA_REPAIR		1.50707		1.4159
ANGIOGENESIS		1.70549		-1.54
FATTY_ACID_METABOLISM			2.07851
ADIPOGENESIS			1.8455
BILE_ACID_METABOLISM			1.75226
NOTCH_SIGNALING			-1.8834
TGF_BETA_SIGNALING			-1.92082
WNT_BETA_CATENIN_SIGNALING			-1.88706
MITOTIC_SPINDLE		-1.56914	-1.8748
COAGULATION		1.58518	1.44595
G2M_CHECKPOINT		-1.58598	2.12787
ESTROGEN_RESPONSE_LATE	0.314146		1.89005
KRAS_SIGNALING_DN		-1.47686
ANDROGEN_RESPONSE				1.65269
HYPOXIA	-1.50815
IL2_STAT5_SIGNALING	-1.49849
COMPLEMENT	-1.74074
