# Supplementary material for: Genetically manipulating endogenous Kras levels and oncogenic mutations in vivo influences tissue patterning of murine tumorigenesis
Source: eLife. 2022 Sep 7;11:e75715. doi: 10.7554/eLife.75715 (PMC9451540; doi:10.7554/eLife.75715)
Supplement: Figure 3—source data 3. [file elife-75715-fig3-data3.xlsx]

## Sheet: all wrt WT1
	cT
	Actin		IL10	IL6	TNF	CDH1	SOX5	TWIST1	ZEB2	CCL2	GLI1	MYH1	TNFSF9	LIF	IFNG			IL10	IL6	TNF	CDH1	SOX5	TWIST1	ZEB2	CCL2	GLI1	MYH1	TNFSF9	LIF	IFNG
WT-1	17.1089			31.3808	28.556	22.8382	26.5917	32.6965	24.8596	29.6823	28.041	30.5932	25.8387	26.9413	28.6065		WT-1	1.00028	1.00116	1.00252	1.0067	1.00246	1.01449	1.01263	1.00476	1.00024	1.02994	1.00053	1.00511	1.00406
WT-1	16.9158		32.8613	31.2614	28.3054	22.5002	26.6737	32.9672	24.4734	29.405	28.1003	31.0933	25.7581	27.1152	28.8967		WT-2	16.0024	3.06768	7.03874	0.589187	0.631934	0.336625	0.625416	5.50217	0.396782	0.345339	0.875909	0	0
WT-1	16.9311	16.9853	32.7928	31.2149	28.4319	22.4617	26.431	33.298	24.3064	29.7153	28.1135	31.4431	25.727	26.7583	28.8578		NatG12D-1	0.562293	1.42244	0.457658	0.900945	0.767154	0.41057	0.629212	0.749498	0.929457	0.555183	0.689859	1.25453	0.670142
WT-2	16.0934		32.0061	28.5553	24.7477	22.6655	26.1508	33.4086	24.7873	26.1	27.5692	31.4178	25.0911				NatG12D-2	0.459863	1.06681	0.643157	0.969892	1.06879	0.757094	0.561027	1.03822	1.70984	1.18966	1.15544	0	0
WT-2	15.9021		27.167	28.6894	24.5539	22.1552	26.4174	33.5103	24.1485	26.0915	30.4916	32.085	24.8906				NatQ61R-1	0.187123	1.10411	0.977597	1.02189	1.50513	0.223641	0.761069	0.820879	1.14804	1.05485	0.96835	0.455906	0.947842
WT-2	15.8761	15.9572	27.3171	28.6807	24.475	22.2352	26.0545	33.6843	23.8133	26.1475		31.268	24.8432				NatQ61R-2	0.534748	1.24124	0.685436	1.07549	1.17489	0.908005	0.488881	1.27129	1.2669	0.830569	0.833985	0.717433	0.636001
NatG12D-1	16.7709			30.7693	29.4375	22.7607	26.693	34.0988	25.181	30.0212	27.7368	31.8729	26.0915	26.2996	29.2447		ComG12D-1	0.537464	2.35092	1.04432	0.995716	0.84696	0.323045	0.557364	0.925169	1.49813	1.13928	1.16937	0.842985	1.22118
NatG12D-1	16.6514		34.3878	30.2222	29.1649	22.3058	26.7292	33.6791	24.9249	29.419	27.7309	31.5698	25.8869	26.3449	29.0305		ComG12D-2	1.88741	3.10181	1.39158	0.902682	0.946809	3.05824	0.384966	4.10063	1.58627	1.12071	1.54447	0.990448	1.00555
NatG12D-1	16.5422	16.6549	33.7575	30.4019	29.1041	22.2466	26.4468	34.0861	24.6053	29.6816	28.1514	31.2992	25.9684	26.2014	28.8534		ComQ61R-1	1.0796	2.09797	3.72891	0.780775	0.501334	0.29181	0.272933	3.77507	0.843148	0.209475	3.15489	1.03885	0.87048
NatG12D-2	16.9069		34.501	30.9851	28.9124	22.8632	26.1801	33.3147	25.1668	29.4943	27.063	30.6938	25.3816				ComQ61R-2	0.758169	2.78995	4.73134	0.435838	0.433993	0.397875	0.146786	25.4491	0.599297	0.225049	2.1392	0.582648	0.638425
NatG12D-2	16.692		32.7686	31.0491	28.6509	22.2825	26.2525	32.9217	24.9428	29.1252		30.6185	25.3228
NatG12D-2	16.6075	16.7355	34.6346	30.8048	28.9066	22.1351	26.2274	33.2094	25.3053	29.2949	27.0595	30.3406	25.2479
NatQ61R-1	17.3732		34.8328	32.0587	28.8029	22.93	26.2392	35.2454	25.6998	30.5445	28.101	31.2372	26.2478	28.8348	28.9775			IL10	IL6	TNF	CDH1	SOX5	TWIST1	ZEB2	CCL2	GLI1	MYH1	TNFSF9	LIF	IFNG
NatQ61R-1	17.2846			30.9929	28.7915	22.9551	26.3728	35.6291	25.3566	30.1629	28.1698	31.0924	26.1501	28.1706	29.3504		WT-1	0.0335408	0.058654	0.087019	0.138354	0.0868294	0.208538	0.191123	0.122292	0.0269372	0.309075	0.0396369	0.124266	0.112623
NatQ61R-1	17.307	17.3216	37.2255	31.5839	28.8061	22.8333	26.327	35.6119	24.8893	30.0097	28.4141	31.6301	26.0792	28.3002	29.3034		WT-2	13.1654	0.161817	0.670984	0.105961	0.0799408	0.0321072	0.200878	0.114312	0.430349	0.0950846	0.0779816	0	0
NatQ61R-2	17.0942		34.1647	30.6916	29.0497	22.5062	26.1722	33.1111	25.8013	29.1306	27.6705	31.2568	26.0005	27.5502	29.6171		NatG12D-1	0.386193	0.265215	0.0544591	0.165324	0.0839114	0.070832	0.126513	0.153953	0.147208	0.109287	0.0488738	0.0643204	0.0902311
NatQ61R-2	16.8171		33.5696	31.1495	28.9253	22.4063	26.2945	32.9101	25.3012	29.4586	27.487	31.2485	25.9459	27.322	29.1416		NatG12D-2	0.360372	0.095286	0.0684276	0.239769	0.0273065	0.109505	0.0720031	0.131998	0.00291517	0.157677	0.0537774	0	0
NatQ61R-2	16.8615	16.9243	33.3831	30.9341	28.7824	22.3923	26.3551	33.1898	25.4946	29.026	27.9232	31.2447	25.9806	27.2167	29.4178		NatQ61R-1	0.179969	0.4094	0.00519407	0.0460357	0.0713204	0.0349089	0.216873	0.150264	0.127229	0.1945	0.056528	0.103746	0.138036
ComG12D-1	17.2408		34.6543	30.0602	28.6435	23.0074	26.8546	34.8997	25.8528	29.7065	27.712	30.8911	25.5679	27.2342	28.4865		NatQ61R-2	0.140325	0.197371	0.0636778	0.0457359	0.0766151	0.0923987	0.083505	0.191385	0.189504	0.0035767	0.0160017	0.0829046	0.106287
ComG12D-1	16.8143		34.4994	30.0089	28.1969	22.4337	26.878	35.248	25.2941	29.5466	27.5043	30.9319	25.7458	27.4144	28.549		ComG12D-1	0.395483	0.21623	0.1647	0.194736	0.00927243	0.136076	0.119128	0.177152	0.134045	0.0162122	0.0981845	0.0945936	0.0603832
ComG12D-1	17.0655	17.0402	32.8911	30.2659	28.4655	22.601	26.8478	34.1119	25.2605	30.1072	27.4659	30.9074	25.5084	27.0888	28.6292		ComG12D-2	0.388255	0.505195	0.758639	0.13461	0.0693436	0.611091	0.0341825	0.957407	0.0328346	0.129997	0.0340978	0.0677155	0.596611
ComG12D-2	16.6023		31.3168	29.553	27.2408	22.7113	26.4375	31.1193	25.5931	27.7182	27.1471	30.4039	24.8724	26.6755	30.1434		ComQ61R-1	0.18068	0.167948	0.722115	0.087128	0.0273268	0.0280549	0.0915905	0.774331	0.0422626	0.0472803	0.20187	0.0455817	0.0242745
ComG12D-2	16.653		31.8902	29.432	27.2797	22.3829	26.2327	31.3663	25.7722	27.0948	27.1244	30.7238	24.8595	26.7402	28.0829		ComQ61R-2	0.288641	0.207518	1.55707	0.022016	0.00187409	0.0431837	0.0189057	3.21235	0.0531746	0.0764959	0.124587	0.0192234	0.076259
ComG12D-2	16.8014	16.6856	31.6853	29.1106	29.0859	22.2839	26.3713	30.796	25.5183	27.0714	27.088	30.6285	24.8122	26.5482	28.0271
ComQ61R-1	16.3722		32.2736	29.5129	26.1527	22.4238	26.8944	33.9736	26.1951	27.0798	27.7038	32.4665	23.3023	26.2339	28.2608
ComQ61R-1	16.1533		31.9929	29.3882	25.5832	22.0999	26.8946	33.9722	25.2536	26.6707	27.5757	33.0117	23.4731	26.1717	28.3198
ComQ61R-1	16.2906	16.272	31.7847	29.6184	25.7781	22.2261	26.7603	34.2206	25.8294	27.2209	27.5777	32.3581	23.4417	26.1073	28.2422
ComQ61R-2	16.3329		32.2822	29.4026	25.3346	23.3284	27.2399	33.6689	26.8436	24.3418	28.3519	32.3827	24.2145	27.2128	28.9664
ComQ61R-2	16.4714		32.5777	29.2022	25.4913	23.2873	27.2313	33.7308	26.5887	24.6201	28.1523	32.4281	24.1738	27.1321	29.0421
ComQ61R-2	16.557	16.4537	33.4707	29.2251	26.33	23.1879	27.2434	33.9739	26.9404	24.2615	28.3831	33.3809	24.0547	27.2148	28.7202
			IL10	IL6	TNF	ECAD	SOX5	TWISTR1	ZEB2	CCL2	GLI1	MYH1	TNFSF9	LIF	IFNG
WT-1				14.3955	11.5707	5.85294	9.60644	15.7112	7.87433	12.6971	11.0558	13.6079	8.85342	9.95601	11.6213
WT-1			15.876	14.2761	11.3201	5.51489	9.68844	15.9819	7.48811	12.4197	11.1151	14.108	8.77287	10.1299	11.9115
WT-1			15.8076	14.2297	11.4467	5.47648	9.4457	16.3128	7.32117	12.73	11.1282	14.4578	8.74177	9.77309	11.8725
WT-2			16.0489	12.5981	8.79047	6.7083	10.1936	17.4514	8.83009	10.1428	11.612	15.4606	9.13387
WT-2			11.2098	12.7322	8.59674	6.19796	10.4602	17.5531	8.19129	10.1343	14.5344	16.1278	8.93344
WT-2			11.3599	12.7235	8.51783	6.278	10.0973	17.7271	7.8561	10.1903		15.3108	8.886
NatG12D-1				14.1145	12.7826	6.10583	10.0382	17.444	8.52614	13.3663	11.0819	15.218	9.43664	9.64471	12.5899
NatG12D-1			17.733	13.5673	12.51	5.6509	10.0744	17.0242	8.27004	12.7641	11.0761	14.915	9.23203	9.69007	12.3756
NatG12D-1			17.1026	13.747	12.4492	5.59178	9.79195	17.4312	7.95045	13.0268	11.4966	14.6443	9.31359	9.54654	12.1986
NatG12D-2			17.7656	14.2497	12.1769	6.1277	9.44467	16.5793	8.43134	12.7588	10.3276	13.9584	8.64609
NatG12D-2			16.0332	14.3136	11.9155	5.54708	9.51701	16.1862	8.20736	12.3897		13.883	8.58729
NatG12D-2			17.8991	14.0693	12.1712	5.3996	9.4919	16.4739	8.56986	12.5595	10.3241	13.6051	8.51245
NatQ61R-1			17.5112	14.737	11.4813	5.6084	8.91755	17.9238	8.3782	13.2229	10.7793	13.9156	8.92616	11.5131	11.6559
NatQ61R-1				13.6713	11.4699	5.63345	9.05119	18.3075	8.035	12.8413	10.8481	13.7707	8.82846	10.8489	12.0287
NatQ61R-1			19.9039	14.2623	11.4844	5.51165	9.00539	18.2903	7.56769	12.688	11.0924	14.3085	8.75758	10.9786	11.9817
NatQ61R-2			17.2405	13.7673	12.1254	5.5819	9.24793	16.1868	8.87709	12.2063	10.7463	14.3326	9.07626	10.6259	12.6929
NatQ61R-2			16.6453	14.2252	12.0011	5.48208	9.37029	15.9858	8.37694	12.5343	10.5628	14.3243	9.02169	10.3977	12.2173
NatQ61R-2			16.4588	14.0098	11.8582	5.468	9.43085	16.2655	8.57033	12.1017	10.999	14.3204	9.05636	10.2925	12.4936
ComG12D-1			17.6141	13.0199	11.6032	5.96719	9.81431	17.8594	8.81252	12.6663	10.6718	13.8508	8.52763	10.194	11.4462
ComG12D-1			17.4592	12.9687	11.1567	5.3935	9.83775	18.2078	8.25385	12.5063	10.464	13.8917	8.70555	10.3741	11.5088
ComG12D-1			15.8509	13.2256	11.4253	5.5608	9.80759	17.0717	8.22022	13.067	10.4257	13.8672	8.46813	10.0485	11.589
ComG12D-2			14.6312	12.8674	10.5552	6.02568	9.7519	14.4337	8.90752	11.0326	10.4615	13.7183	8.18685	9.98996	13.4578
ComG12D-2			15.2046	12.7464	10.5941	5.69727	9.54713	14.6807	9.08657	10.4092	10.4388	14.0382	8.17393	10.0546	11.3974
ComG12D-2			14.9997	12.425	12.4003	5.59831	9.68575	14.1104	8.83275	10.3858	10.4024	13.9429	8.12665	9.86263	11.3415
ComQ61R-1			16.0016	13.2409	9.88071	6.15174	10.6224	17.7016	9.92309	10.8077	11.4318	16.1945	7.03027	9.96187	11.9888
ComQ61R-1			15.7208	13.1162	9.31122	5.8279	10.6226	17.7002	8.98161	10.3986	11.3037	16.7397	7.20112	9.89966	12.0478
ComQ61R-1			15.5127	13.3464	9.50606	5.95403	10.4883	17.9486	9.55742	10.9489	11.3057	16.0861	7.16969	9.83529	11.9702
ComQ61R-2			15.8284	12.9489	8.88083	6.87465	10.7862	17.2152	10.3899	7.88806	11.8982	15.9289	7.76073	10.759	12.5126
ComQ61R-2			16.1239	12.7485	9.03759	6.83354	10.7776	17.277	10.1349	8.16638	11.6985	15.9743	7.72001	10.6784	12.5883
ComQ61R-2			17.0169	12.7714	9.87628	6.73417	10.7896	17.5202	10.4867	7.80773	11.9293	16.9272	7.60092	10.7611	12.2665
		avg control	15.8418	14.3004	11.4458	5.61477	9.58019	16.002	7.5612	12.6156	11.0997	14.0579	8.78935	9.953	11.8018
			IL10	IL6	TNF	ECAD	SOX5	TWISTR1	ZEB2	CCL2	GLI1	MYH1	TNFSF9	LIF	IFNG
WT-1				0.0950807	0.124873	0.238171	0.026246	-0.290745	0.313125	0.081481	-0.0439178	-0.449983	0.064064	0.00300863	-0.180499
WT-1			0.0342131	-0.0243073	-0.125704	-0.0998759	0.108247	-0.0200512	-0.0730938	-0.195891	0.0153867	0.0500888	-0.0164785	0.176907	0.109706
WT-1			-0.0342131	-0.0707734	0.000831436	-0.138295	-0.134493	0.310796	-0.240032	0.11441	0.0285311	0.399894	-0.0475855	-0.179915	0.0707929
WT-2			0.20711	-1.70232	-2.65537	1.09353	0.613368	1.4494	1.26889	-2.4728	0.512339	1.40268	0.344514
WT-2			-4.63201	-1.56826	-2.8491	0.583195	0.879985	1.55114	0.630089	-2.48125	3.43472	2.06989	0.144089
WT-2			-4.48191	-1.57692	-2.92801	0.66323	0.517133	1.72518	0.294897	-2.42533		1.25286	0.0966502
NatG12D-1				-0.185953	1.33676	0.491057	0.457978	1.44201	0.964938	0.75072	-0.0177522	1.1601	0.647285	-0.308296	0.78814
NatG12D-1			1.89118	-0.733107	1.0642	0.0361272	0.494166	1.02228	0.708843	0.148509	-0.0236075	0.857051	0.442676	-0.262937	0.573879
NatG12D-1			1.26086	-0.553396	1.00338	-0.0229868	0.211755	1.42928	0.389252	0.411187	0.396893	0.586432	0.524236	-0.406459	0.396823
NatG12D-2			1.92377	-0.050757	0.731091	0.512925	-0.135524	0.57732	0.870138	0.14322	-0.772117	-0.0995361	-0.143261
NatG12D-2			0.19138	0.0132197	0.469614	-0.067687	-0.0631879	0.184268	0.646162	-0.225868		-0.174875	-0.202062
NatG12D-2			2.05735	-0.231102	0.725316	-0.21517	-0.0882962	0.471968	1.00866	-0.0561263	-0.775596	-0.45279	-0.276901
NatQ61R-1			1.66942	0.436587	0.0354586	-0.00636883	-0.662641	1.92179	0.816996	0.607286	-0.320347	-0.142357	0.13681	1.56015	-0.145865
NatQ61R-1				-0.629151	0.0240499	0.0186812	-0.52901	2.30553	0.473793	0.225704	-0.251547	-0.287194	0.0391076	0.895942	0.226971
NatQ61R-1			4.06212	-0.0381393	0.0385978	-0.103125	-0.574801	2.28834	0.00648442	0.07244	-0.007226	0.250543	-0.0317679	1.02561	0.179995
NatQ61R-2			1.39867	-0.533088	0.679597	-0.0328676	-0.332268	0.184844	1.31589	-0.40929	-0.353417	0.27466	0.286906	0.672901	0.891125
NatQ61R-2			0.803517	-0.0752245	0.555219	-0.132692	-0.209908	-0.0161168	0.815742	-0.0812649	-0.536882	0.266359	0.23234	0.444708	0.415546
NatQ61R-2			0.617021	-0.290619	0.41232	-0.146767	-0.149345	0.263547	1.00912	-0.513876	-0.10068	0.262493	0.267004	0.339485	0.691819
ComG12D-1			1.77231	-1.28051	0.157371	0.352416	0.234118	1.85747	1.25131	0.0506654	-0.427868	-0.207097	-0.261727	0.240971	-0.355542
ComG12D-1			1.61738	-1.33175	-0.289176	-0.221266	0.25756	2.20579	0.692644	-0.109273	-0.635644	-0.166249	-0.083801	0.421136	-0.292978
ComG12D-1			0.00907981	-1.07481	-0.0205511	-0.0539733	0.227397	1.06972	0.659021	0.4514	-0.674012	-0.190747	-0.321226	0.0955078	-0.212753
ComG12D-2			-1.21056	-1.43304	-0.890645	0.410913	0.1717	-1.5683	1.34632	-1.58302	-0.638166	-0.339597	-0.602506	0.0369531	1.65606
ComG12D-2			-0.637187	-1.55398	-0.851759	0.082497	-0.0330648	-1.32123	1.52537	-2.20641	-0.660907	-0.0197227	-0.615421	0.101619	-0.404398
ComG12D-2			-0.842108	-1.87539	0.954427	-0.0164651	0.105556	-1.89157	1.27154	-2.22979	-0.697238	-0.114981	-0.662699	-0.0903746	-0.460281
ComQ61R-1			0.159837	-1.0595	-1.56513	0.536974	1.04219	1.69966	2.36189	-1.80786	0.332149	2.13661	-1.75908	0.00886493	0.187013
ComQ61R-1			-0.120942	-1.1842	-2.13462	0.21313	1.04238	1.69826	1.42041	-2.21696	0.203992	2.68176	-1.58823	-0.053338	0.246003
ComQ61R-1			-0.329102	-0.95406	-1.93978	0.339259	0.908096	1.94666	1.99622	-1.6667	0.205985	2.0282	-1.61966	-0.117714	0.168466
ComQ61R-2			-0.0133755	-1.35153	-2.56501	1.25988	1.20599	1.21323	2.8287	-4.72753	0.798508	1.87101	-1.02862	0.806007	0.710877
ComQ61R-2			0.28217	-1.55194	-2.40825	1.21877	1.19736	1.27508	2.57372	-4.44921	0.598836	1.91642	-1.06934	0.725374	0.78659
ComQ61R-2			1.17515	-1.52904	-1.56956	1.11939	1.20944	1.51821	2.92546	-4.80786	0.829664	2.86928	-1.18844	0.808081	0.464713
			IL10	IL6	TNF	ECAD	SOX5	TWISTR1	ZEB2	CCL2	GLI1	MYH1	TNFSF9	LIF	IFNG
				0.93622	0.917085	0.847819	0.981972	1.22327	0.804896	0.945087	1.03091	1.36602	0.956566	0.997917	1.13328
			0.976564	1.01699	1.09104	1.07168	0.927714	1.014	1.05197	1.14543	0.989391	0.965877	1.01149	0.884598	0.926777
			1.024	1.05028	0.999424	1.1006	1.09771	0.806197	1.18102	0.92376	0.980418	0.757914	1.03353	1.13282	0.952115
			0.866271	3.25424	6.30009	0.468614	0.653669	0.366175	0.41498	5.5512	0.701085	0.378225	0.787573
			24.7955	2.96546	7.20553	0.667484	0.543373	0.34124	0.646137	5.58379	0.0924795	0.238177	0.90495
			22.3455	2.98332	7.6106	0.631463	0.698759	0.30246	0.815131	5.37152		0.419616	0.935202
			1	1.13757	0.395908	0.711503	0.728006	0.368055	0.5123	0.594307	1.01238	0.44748	0.638481	1.23824	0.57909
			0.269586	1.66222	0.478238	0.975269	0.709972	0.492338	0.611811	0.902182	1.0165	0.55208	0.735768	1.19992	0.671808
			0.417295	1.46754	0.498829	1.01606	0.863486	0.371316	0.763525	0.752004	0.759492	0.665988	0.695327	1.32543	0.759529
			0.263564	1.03581	0.602448	0.7008	1.09849	0.670208	0.547094	0.905496	1.70777	1.07143	1.1044
			0.875768	0.990879	0.722158	1.04804	1.04477	0.880095	0.638978	1.16948		1.12887	1.15034
			0.240258	1.17373	0.604865	1.16084	1.06311	0.72098	0.497008	1.03967	1.7119	1.36868	1.21159
			#REF!	#REF!	#REF!	#REF!	#REF!			#REF!	#REF!	#REF!	#REF!	#REF!	#REF!
			#REF!	#REF!	#REF!	#REF!	#REF!			#REF!	#REF!	#REF!	#REF!	#REF!	#REF!
			#REF!	#REF!	#REF!	#REF!	#REF!			#REF!	#REF!	#REF!	#REF!	#REF!	#REF!
			0.31438	0.73888	0.975722	1.00442	1.58298	0.263926	0.567623	0.65643	1.24863	1.10371	0.909528	0.339117	1.10639
				1.54665	0.983468	0.987135	1.44294	0.202286	0.720069	0.855177	1.19048	1.22026	0.973257	0.537396	0.854427
			0.0598661	1.02679	0.973601	1.0741	1.48947	0.204711	0.995515	0.951028	1.00502	0.84058	1.02226	0.491204	0.882706
			0.379277	1.44702	0.62434	1.02304	1.25899	0.879744	0.401677	1.32803	1.27758	0.826645	0.819658	0.627244	0.539193
			0.572951	1.05352	0.680554	1.09634	1.15661	1.01123	0.568116	1.05795	1.45083	0.831415	0.851253	0.734733	0.749736
			0.652016	1.22317	0.751414	1.10709	1.10907	0.833037	0.496848	1.42788	1.07228	0.833646	0.831043	0.790323	0.619073
			0.292739	2.42924	0.896658	0.783271	0.850204	0.275959	0.420065	0.965491	1.34524	1.15436	1.19891	0.846175	1.27947
			0.325926	2.51707	1.22194	1.16576	0.836502	0.216766	0.618719	1.07868	1.55363	1.12214	1.05981	0.746836	1.22517
			0.993726	2.10644	1.01435	1.03812	0.854175	0.47641	0.633308	0.731333	1.5955	1.14135	1.24939	0.935943	1.1589
			2.31427	2.70015	1.85401	0.752147	0.887796	2.96555	0.393293	2.99596	1.55635	1.2654	1.51835	0.974711	0.317304
			1.55529	2.93627	1.8047	0.944422	1.02318	2.49878	0.34739	4.61526	1.58108	1.01376	1.532	0.931987	1.32354
			1.79267	3.66901	0.516046	1.01148	0.929447	3.71038	0.414216	4.69066	1.6214	1.08296	1.58304	1.06465	1.37581
			0.895126	2.08421	2.95905	0.689215	0.485589	0.307858	0.194536	3.50122	0.794352	0.227414	3.38483	0.993874	0.878423
			1.08744	2.27237	4.39121	0.862664	0.485525	0.308157	0.373607	4.64912	0.868145	0.155851	3.00681	1.03766	0.843229
			1.25623	1.93732	3.83648	0.790447	0.532888	0.259416	0.250656	3.17488	0.866947	0.245161	3.07303	1.08501	0.889788
			1.00931	2.55182	5.91758	0.41758	0.433472	0.431303	0.140759	26.4928	0.574943	0.273382	2.04007	0.571963	0.610948
			0.822353	2.9321	5.3083	0.429649	0.436073	0.413203	0.16797	21.8446	0.660287	0.264912	2.09848	0.60484	0.579713
			0.442838	2.88594	2.96814	0.460287	0.432435	0.349118	0.131628	28.0097	0.56266	0.136855	2.27905	0.571141	0.724615
			IL10	IL6	TNF	ECAD	SOX5	TWISTR1	ZEB2	CCL2	GLI1	MYH1	TNFSF9	LIF	IFNG
		WT-1	1.00028	1.00116	1.00252	1.0067	1.00246	1.01449	1.01263	1.00476	1.00024	1.02994	1.00053	1.00511	1.00406
		WT-2	16.0024	3.06768	7.03874	0.589187	0.631934	0.336625	0.625416	5.50217	0.396782	0.345339	0.875909
		NatG12D-1	0.562293	1.42244	0.457658	0.900945	0.767154	0.41057	0.629212	0.749498	0.929457	0.555183	0.689859	1.25453	0.670142
		NatG12D-2	0.459863	1.06681	0.643157	0.969892	1.06879	0.757094	0.561027	1.03822	1.70984	1.18966	1.15544
		NatQ61R-1	0.187123	1.10411	0.977597	1.02189	1.50513	0.223641	0.761069	0.820879	1.14804	1.05485	0.96835	0.455906	0.947842
		NatQ61R-2	0.534748	1.24124	0.685436	1.07549	1.17489	0.908005	0.488881	1.27129	1.2669	0.830569	0.833985	0.717433	0.636001
		ComG12D-1	0.537464	2.35092	1.04432	0.995716	0.84696	0.323045	0.557364	0.925169	1.49813	1.13928	1.16937	0.842985	1.22118
		ComG12D-2	1.88741	3.10181	1.39158	0.902682	0.946809	3.05824	0.384966	4.10063	1.58627	1.12071	1.54447	0.990448	1.00555
		ComQ61R-1	1.0796	2.09797	3.72891	0.780775	0.501334	0.29181	0.272933	3.77507	0.843148	0.209475	3.15489	1.03885	0.87048
		ComQ61R-2	0.758169	2.78995	4.73134	0.435838	0.433993	0.397875	0.146786	25.4491	0.599297	0.225049	2.1392	0.582648	0.638425
			IL10	IL6	TNF	ECAD	SOX5	TWISTR1	ZEB2	CCL2	GLI1	MYH1	TNFSF9	LIF	IFNG
		WT-1	0.0335408	0.058654	0.087019	0.138354	0.0868294	0.208538	0.191123	0.122292	0.0269372	0.309075	0.0396369	0.124266	0.112623
		WT-2	13.1654	0.161817	0.670984	0.105961	0.0799408	0.0321072	0.200878	0.114312	0.430349	0.0950846	0.0779816
		NatG12D-1	0.386193	0.265215	0.0544591	0.165324	0.0839114	0.070832	0.126513	0.153953	0.147208	0.109287	0.0488738	0.0643204	0.0902311
		NatG12D-2	0.360372	0.095286	0.0684276	0.239769	0.0273065	0.109505	0.0720031	0.131998	0.00291517	0.157677	0.0537774
		NatQ61R-1	0.179969	0.4094	0.00519407	0.0460357	0.0713204	0.0349089	0.216873	0.150264	0.127229	0.1945	0.056528	0.103746	0.138036
		NatQ61R-2	0.140325	0.197371	0.0636778	0.0457359	0.0766151	0.0923987	0.083505	0.191385	0.189504	0.0035767	0.0160017	0.0829046	0.106287
		ComG12D-1	0.395483	0.21623	0.1647	0.194736	0.00927243	0.136076	0.119128	0.177152	0.134045	0.0162122	0.0981845	0.0945936	0.0603832
		ComG12D-2	0.388255	0.505195	0.758639	0.13461	0.0693436	0.611091	0.0341825	0.957407	0.0328346	0.129997	0.0340978	0.0677155	0.596611
		ComQ61R-1	0.18068	0.167948	0.722115	0.087128	0.0273268	0.0280549	0.0915905	0.774331	0.0422626	0.0472803	0.20187	0.0455817	0.0242745
		ComQ61R-2	0.288641	0.207518	1.55707	0.022016	0.00187409	0.0431837	0.0189057	3.21235	0.0531746	0.0764959	0.124587	0.0192234	0.076259
