# Supplementary material for: Genetically manipulating endogenous Kras levels and oncogenic mutations in vivo influences tissue patterning of murine tumorigenesis
Source: eLife. 2022 Sep 7;11:e75715. doi: 10.7554/eLife.75715 (PMC9451540; doi:10.7554/eLife.75715)
Supplement: Supplementary file 1. [file elife-75715-supp1.xlsx]

## Sheet: Sheet1
KRAS Genotype	Sample ID	RAS_Total	ERK_T202_Y204	ERK_Total	MEK_1_2_S217_221	MEK1_S298	MAPK_pTEpY	MEK_1_2_Total	p38_MAPK_T180_Y182	p38_MAP_Kinase_Total	Raf_S259	B_Raf_S445	c_Raf_S338	cMyc_S62	cMyc_Total	Ras_GRF1_S916	Ras_GRF1	Elk1_S383	PAK1_S199_204_PAK2_S192_197	p70S6Kinase_S371	p70S6Kinase_T389	p70_S6_Kinase_Total	MSK1_S360	RSK2	RSK3_T356_S360	p90RSK_S380	p90RSK_T359_S363	S6_Ribosomal_Protein_S235_236	4EBP1_S65	4EBP1_T70	PI3K_p85_Y458_p55_Y199	PI3Kinase_p110gamma	PI3_Kinase	AKT_S473	AKT_T308	AKT_Total	PRAS40_T246	AMPK_alpha1_S485	PKA_C_T197	GSK_3_a_B_S21_9	GSK3_beta_S9	GSK3_beta	PTEN_S380	PTEN	mTOR_S2448	mTOR_Total	CREB_S133	IL10	IL6
KrasLSL-natG12D/+	3222	1	70.8808	6.37255	81.2069	1	4064.31	60.8858	610.941	1	47.6556	65.5623	1	1	554.463	1	1	1	777.435	1	62.1779	1	1	1	169.525	104.585	468.249	680.617	1	111.163	1	1	1	1	1	146.496	1077.07	310.753	1	81.8592	1	1	1	44.2564	1	1	1	1	1574.98
KrasLSL-natG12D/+	3223	877.432	115.238	235.097	216.589	1	1	1	432.681	10.2677	139.212	140.752	1209.55	356.025	1	1	1	2155.98	1883.71	255.188	275.614	88.677	1	250.135	359.963	297.972	2158.14	859.199	376.908	311.687	45.2408	1406.7	1137.97	132.29	1008.28	812.406	5415.39	1	1	231.597	525.842	1	188.859	61.7442	190.948	1	592.885	1	2132.39
KrasLSL-natG12D/+	3317	1294.66	9.38394	172.087	54.0009	1	1728.48	6.24012	518.013	1	148.117	61.0077	2217.2	427.52	1	1	1	2550.39	2555.49	271.239	684.029	1	1	57.2828	1061.03	374.653	177.328	2071.44	256.98	95.9666	1	1073.84	491.765	140.752	174.513	513.885	4750.47	401.417	398.218	400.615	637.147	1	327.668	48.1345	110.609	1	304.6	276.718	1763.4
KrasLSL-natG12D/+	3318	3608.33	4121.62	7661.78	799.511	2721.67	494.23	1323.45	3334.24	580.564	1119.91	1469.97	5955.08	1492.19	792.348	1984.26	113.296	5324.11	3463.38	1002.25	3515.72	168.342	1	2162.46	1800.82	1328.76	903.251	3096.41	1590.81	1099.93	1391.31	2460.21	6161.03	2895.75	5710.14	1600.39	7707.89	2026.37	2126.01	1937.2	3143.21	1	2951.3	460.816	981.419	95.2972	3394.8	2855.49	2413.9
KrasLSL-comQ61R/+	3417	4764.75	4125.74	16301.3	797.116	6002.91	217.892	555.018	2406.67	1301.15	1597.19	221.185	8821.97	1052.58	1195.12	570.207	258.269	10229.2	679.937	976.524	2762.8	682.662	207.473	1474.39	2106.96	1439.43	1312.91	2340.22	2034.49	1740.63	1536.1	3016.95	2038.56	2375.59	3314.29	1402.48	4019.85	1579.72	5115.34	2370.84	3398.19	1	2016.26	453.956	1835.37	95.4879	3090.23	1373.34	3038.14
KrasLSL-comQ61R/+	3418	12357.3	46630	59874.1	7435.34	11441.5	699.244	2230.54	40945.6	10710.7	10764.4	8892.83	18863.8	4238.65	4225.95	11920.3	3877.71	18657.4	9237.25	2930.71	8786.75	1853.81	3143.21	11626	6509.38	9672.09	5313.47	10872.6	6741.25	2040.6	28566.8	10753.6	12016.1	15724.9	13602.4	7222.82	7982.44	7465.15	9585.44	10753.6	22925.4	7442.78	15568.4	14824	12064.2	4610.08	10046.7	4679.75	7273.55
KrasLSL-comQ61R/+	3419	6075.38	14603.3	32209	2347.25	6247.89	1	1	12161.1	3278.04	3999.8	3168.46	9798.65	6953.5	716.229	4264.16	582.308	7480.09	3274.76	1536.1	2844.09	1	828.817	3007.91	2855.49	3597.52	941.995	3862.23	2502.39	991.283	7808.75	5197.85	3130.66	4600.87	5292.26	2092.26	7129.52	2071.44	4264.16	4294.11	7638.83	2678.47	6235.41	2662.44	3684.9	1199.91	2601.91	1958.63	4007.81
Kras+/+	3221	3093.32	5535.85	10280.5	989.302	1	1603.59	25.381	2762.8	873.93	1461.18	1324.78	4429.31	4633.19	712.657	1207.13	1	4610.08	2077.66	943.881	2366.1	1	568.499	1380.22	1240.17	1346.14	1391.31	824.684	940.113	917.819	2138.8	2296.17	2246.21	3710.79	4890.26	1564	3274.76	190.186	1	2910.27	4019.85	562.28	2168.95	551.146	1622.95	1	1246.38	998.246	2347.25
Kras+/+	3325	3648.24	2565.73	15382.7	1565.56	5535.85	380.315	962.948	7215.59	2014.25	3238.94	1774.01	6386.87	1998.2	228.378	1540.71	368.338	13766.6	2916.09	1811.66	3439.22	143.595	198.74	2527.54	1675.72	3268.22	1893.15	1597.19	1986.24	1664.03	5613.9	3979.85	3314.29	2261.99	3425.49	2050.83	4315.64	1910.27	2969.06	4689.12	6399.66	957.188	3979.85	1432.25	3080.97	299.166	2014.25	1269.02	3304.37
Kras+/+	3326	306.74	1	1.93692	55.3126	1	1	1	41.0997	1	256.98	35.3041	102.105	393.862	1	1	1	1256.39	941.995	275.614	30.235	188.67	1	1	1	297.972	1	222.739	1	90.8309	1	1	263.486	181.454	1	271.51	1398.28	1	1	782.896	181.999	1	189.995	55.7011	1	1	105.848	1950.81	1614.85
Kras+/+	3420	1510.2	3558.16	3684.9	397.423	1	854.059	2832.74	1106.55	229.982	533.789	172.95	2307.68	430.523	787.608	33.8182	1	932.622	2186.37	356.025	1	348.975	1	518.013	399.814	653.93	1	157.118	113.522	92.9443	459.436	1126.65	1285.62	1354.25	10.2267	1	1716.43	304.905	1	1495.18	1756.36	1	606.073	281.181	824.684	1	733.627	147.821	2601.91
[truncated: 91 more columns]
