# Supplementary material for: Genetically manipulating endogenous Kras levels and oncogenic mutations in vivo influences tissue patterning of murine tumorigenesis
Source: eLife. 2022 Sep 7;11:e75715. doi: 10.7554/eLife.75715 (PMC9451540; doi:10.7554/eLife.75715)
Supplement: Supplementary file 2. [file elife-75715-supp2.xlsx]

## Sheet: Table S1
Organ Type	Genotype	Biological replicate	PCR #1				PCR #2
			LSL	WT	Recombined	Recombined/WT	LSL	WT	Recombined	Recombined/WT
COLON	KrasLSL-comG12D/+	No tamoxifen	7672.18	6341.26	27.243	0.00429615	6176.31	5920.01	28.536	0.00482026
	KrasLSL-natG12D/+	1	4965.65	6016.43	1986.01	0.330098	1908.41	3716.06	3096.6	0.833301
	KrasLSL-natG12D/+	2	4140.94	6358.13	2509.13	0.394634	1899.53	3605.3	2966.89	0.822924
	KrasLSL-comG12D/+	1	2682.23	5622.43	2603.38	0.463034	1772.23	5594.31	5858.96	1.04731
	KrasLSL-comG12D/+	2	5513.6	6745.89	2918.08	0.432572	2343.94	5936.01	6098.55	1.02738
	KrasLSL-natQ61R/+	1	5045.35	6303.43	2671.67	0.423844	2485.53	6149.89	6324.67	1.02842
	KrasLSL-natQ61R/+	2	4832.23	6389.72	3488.55	0.545963	1701.41	4815.6	5428.26	1.12722
	KrasLSL-comQ61R/+	1	5184.06	7448.31	2049.43	0.275153	2020.11	5968.13	3383.48	0.566924
	KrasLSL-comQ61R/+	2	5351.06	7387.13	1904.84	0.257859	2345.06	6117.72	3219.84	0.526314
DUODENUM	KrasLSL-comG12D/+	No tamoxifen	9400.01	7387.13	151.314	0.0204835	6633.26	5651.72	18.536	0.00327971
	KrasLSL-natG12D/+	1	5869.31	6608.31	2402.01	0.363484	2902.65	5933.72	5013.26	0.844876
	KrasLSL-natG12D/+	2	5098.35	6931.01	2686.3	0.387578	2475.36	6119.43	5415.26	0.884929
	KrasLSL-comG12D/+	1	5032.23	6315.48	3484.67	0.551767	2688.77	6006.01	6110.26	1.01736
	KrasLSL-comG12D/+	2	4317.94	5380.6	2196.72	0.408267	2494.65	6319.43	5976.08	0.945669
	KrasLSL-natQ61R/+	1	3687.87	4648.65	2085.84	0.448698	2144.94	4730.01	4651.55	0.983411
	KrasLSL-natQ61R/+	2	3665.41	4511.35	1922.23	0.426088	2751.53	5649.84	5450.79	0.964769
	KrasLSL-comQ61R/+	1	3675.87	6657.72	1957.13	0.293965	1091.87	5894.38	3513.55	0.596085
	KrasLSL-comQ61R/+	2	3930.99	6268.67	1301.23	0.207577	1762.46	6641.38	3799.62	0.572113
CECUM	KrasLSL-comG12D/+	No tamoxifen	6249.35	5413.35	32.657	0.00603267	5755.84	3755.06	23.243	0.00618978
	KrasLSL-natG12D/+	1	5057.23	5682.35	3045.6	0.535975	4688.01	6257.31	4316.43	0.689822
	KrasLSL-natG12D/+	2	5085.89	6032.31	2798.18	0.463866	5267.43	7308.55	5358.96	0.733246
	KrasLSL-comG12D/+	1	2905.28	4472.53	2535.36	0.566873	4763.77	8067.38	7014.67	0.869511
	KrasLSL-comG12D/+	2	4694.06	6090.94	4339.89	0.712516	2989.06	6239.18	4272.89	0.684848
	KrasLSL-natQ61R/+	1	4259.53	5937.82	4612.48	0.776796	3304.77	6453.84	4681.43	0.725371
	KrasLSL-natQ61R/+	2	4417.23	5698.82	4552.89	0.798918	4025.89	7450.67	5817.43	0.780792
	KrasLSL-comQ61R/+	1	4318.41	7339.77	3452.89	0.470436	3947.48	8603.91	4735.01	0.550332
	KrasLSL-comQ61R/+	2	4212.11	7719.18	3470.48	0.449591	4411.31	9195.5	4949.31	0.538231
ILEUM	KrasLSL-comG12D/+	No tamoxifen	9481.96	7705.33	104.95	0.0136204	6684.84	7860.91	90.95	0.0115699
	KrasLSL-natG12D/+	1	6235.13	5720.31	2518.77	0.440321	4802.31	7360.43	6940.67	0.942971
	KrasLSL-natG12D/+	2	5117.89	6761.31	4197.6	0.620827	3356.94	6770.96	6567.38	0.969932
	KrasLSL-comG12D/+	1	5151.35	6915.18	5141.72	0.74354	3391.18	7526.84	7826.08	1.03976
	KrasLSL-comG12D/+	2	4852.77	6044.65	4115.13	0.68079	2921.13	6229.31	7063.79	1.13396
	KrasLSL-natQ61R/+	1	4786.11	5992.53	4494.72	0.750054	3177.23	7612.67	8581.67	1.12729
	KrasLSL-natQ61R/+	2	4575.82	5873.77	3796.84	0.646406	3863.77	6656.26	7608.96	1.14313
	KrasLSL-comQ61R/+	1	3266.53	6712.77	2872.36	0.427894	2053.23	7271.5	5580.96	0.767512
	KrasLSL-comQ61R/+	2	4177.99	6868.48	2055.65	0.299287	1197.7	4372.67	2740.23	0.626673
JEJUNUM	KrasLSL-comG12D/+	No tamoxifen	8963.31	9395.45	38.95	0.00414563	5107.89	6719.62	61.536	0.00915766
	KrasLSL-natG12D/+	1	6854.84	8454.48	4783.01	0.565737	3258.48	7147.96	6221.38	0.870371
	KrasLSL-natG12D/+	2	7328.72	10897.5	6748.43	0.619261	2990.77	7673.55	6518.08	0.849422
	KrasLSL-comG12D/+	1	5197.94	9203.77	8508.55	0.924463	2948.06	7451.55	7546.38	1.01273
	KrasLSL-comG12D/+	2	5707.89	8443.77	5251.6	0.621949	893.577	2074.48	1402.34	0.675994
	KrasLSL-natQ61R/+	1	2646.53	7971.77	4267.06	0.535272	3231.06	6935.01	5131.26	0.739906
	KrasLSL-natQ61R/+	2	5820.08	10203.8	7385.18	0.72377	3708.48	8438.43	8374.79	0.992459
	KrasLSL-comQ61R/+	1	3791.6	10552.6	3736.82	0.354113	1169.7	5516.38	2233.11	0.404815
	KrasLSL-comQ61R/+	2	6216.55	11922.5	4866.11	0.408144	2319.94	7885.38	3820.01	0.484443
PANCREAS	KrasLSL-comG12D/+	No tamoxifen	7444.79	5674.86	68.828	0.0121286	6333.01	4992.01	165.021	0.033057
	KrasLSL-natG12D/+	1	5515.13	6670.5	4435.6	0.664958	4950.31	5111.89	4548.67	0.889821
	KrasLSL-natG12D/+	2	4241.6	6629.79	4943.31	0.74562	3158.77	4913.01	4695.55	0.955737
	KrasLSL-comG12D/+	1	4754.31	7888.74	7130.84	0.903926	4854.01	6677.48	7713.33	1.15513
	KrasLSL-comG12D/+	2	3673.6	8666.03	8421.84	0.971822	3845.48	6758.48	7629.62	1.1289
	KrasLSL-natQ61R/+	1	5166.01	7741.91	6982.13	0.901862	7237.08	8590.31	10530.2	1.22582
	KrasLSL-natQ61R/+	2	2612.06	4324.08	4027.3	0.931366	4118.31	5692.65	6089.2	1.06966
	KrasLSL-comQ61R/+	1	3190.36	10106.7	6326.26	0.625947	4586.6	7608.67	6020.55	0.791275
	KrasLSL-comQ61R/+	2	5342.18	10516.9	6393.43	0.607922	4334.18	7255.84	4772.96	0.65781
SPLEEN	KrasLSL-comG12D/+	No tamoxifen	11734.3	5138.5	28.121	0.00547261	6592.72	7178.45	54.95	0.00765486
	KrasLSL-natG12D/+	1	7691.62	6080.96	2871.36	0.472188	3160.3	7286.84	7322.52	1.0049
	KrasLSL-natG12D/+	2	7190.26	6833.5	2785.6	0.407639	2918.18	8181.67	7038.28	0.860249
	KrasLSL-comG12D/+	1	6232.96	6978.08	4941.72	0.708177	2073.94	9044.96	9839.64	1.08786
	KrasLSL-comG12D/+	2	6891.55	8015.67	7497.55	0.935361	2402.36	9431.08	10583.3	1.12218
	KrasLSL-natQ61R/+	1	6649.26	7325.5	6244.26	0.8524	2861.89	10022.5	10963.6	1.09389
	KrasLSL-natQ61R/+	2	6214.13	5546.08	4482.55	0.808237	2369.36	7640.96	8586.57	1.12375
	KrasLSL-comQ61R/+	1	5710.6	7550.03	4129.31	0.546925	1232.58	8005.33	5479.2	0.684445
	KrasLSL-comQ61R/+	2	4624.94	8166.62	5458.13	0.668347	790.163	9171.74	6335.15	0.690725
GLANDULAR STOMACH	KrasLSL-comG12D/+	No tamoxifen	10535.2	6432.5	17.536	0.00272616	25115.1	30434	521.607	0.0171389
	KrasLSL-natG12D/+	1	9415.62	6674.67	2554.18	0.382668	18919.1	29785.6	15072.5	0.506035
	KrasLSL-natG12D/+	2	7248.08	7239.43	4223.77	0.58344	14445.6	29793.7	21149.8	0.709875
	KrasLSL-comG12D/+	1	7425.96	7739.13	3491.36	0.45113	16388.3	36064.3	21666.3	0.600767
	KrasLSL-comG12D/+	2	7787.62	6794.84	3412.48	0.502216	9423.22	25243.3	17180.7	0.680602
	KrasLSL-natQ61R/+	1	7980.45	7392.55	5379.18	0.72765	18782.6	38279.1	33203.2	0.867396
	KrasLSL-natQ61R/+	2	7915.38	7987.13	5899.72	0.738653	17698.5	36287.9	30928.2	0.852302
	KrasLSL-comQ61R/+	1	6508.6	8784.08	4343.77	0.494505	10195.2	32936.1	17692.1	0.537164
	KrasLSL-comQ61R/+	2	7528.38	8260.08	3760.65	0.45528	16959	41432.7	20157.9	0.486523
FORESTOMACH	KrasLSL-comG12D/+	No tamoxifen	9621.03	7919.98	81.95	0.0103472	6147.84	7402.62	28.536	0.00385485
	KrasLSL-natG12D/+	1	8620.38	7656.84	2475.06	0.323248	4894.84	7671.67	4712.84	0.614318
	KrasLSL-natG12D/+	2	7710.08	7981.67	3945.6	0.494332	3913.6	7898.43	6221.2	0.787651
	KrasLSL-comG12D/+	1	5483.79	6433.26	2965.36	0.460942	4320.18	8892.13	6059.26	0.681417
	KrasLSL-comG12D/+	2	4825.55	7322.2	3453.77	0.471684	2605.06	6536.84	4855.67	0.742816
	KrasLSL-natQ61R/+	1	7070.5	6900.08	2142.51	0.310504	4810.48	9638.55	8827.5	0.915853
	KrasLSL-natQ61R/+	2	6579.96	8208.89	5450.48	0.663972	4406.48	9037.55	8075.38	0.893536
	KrasLSL-comQ61R/+	1	5980.26	10561.7	4380.48	0.414752	2730.06	8488.91	4947.31	0.582796
	KrasLSL-comQ61R/+	2	5945.26	10796.7	4430.06	0.410317	4371.48	10058.3	5642.38	0.56097
KIDNEY	KrasLSL-comG12D/+	No tamoxifen	12158	6670.96	26.536	0.00397784	5974.72	6429.62	72.95	0.0113459
	KrasLSL-natG12D/+	1	11080.3	6561.77	1253.7	0.191061	6092.01	8083.84	3794.55	0.469399
	KrasLSL-natG12D/+	2	10721	6931.01	2328.94	0.336017	5224.31	8677.55	7026.2	0.809699
	KrasLSL-comG12D/+	1	11266.1	7519.48	3741.48	0.497571	4692.48	8965.96	6997.5	0.780451
	KrasLSL-comG12D/+	2	9764.45	7046.13	2546.36	0.361383	3231.77	8452.67	7183.38	0.849835
	KrasLSL-natQ61R/+	1	10094.8	7370.72	2850.94	0.386793	5017.48	9164.96	5783.26	0.631018
	KrasLSL-natQ61R/+	2	8983.28	4977.18	1145.16	0.230083	4058.18	9018.91	7405.96	0.821159
	KrasLSL-comQ61R/+	1	8626.91	6103.26	764.678	0.12529	3659.06	10251.5	6769.2	0.660314
	KrasLSL-comQ61R/+	2	10076	8873.72	1119.97	0.126212	3787.06	10345.7	5852.26	0.565668
LIVER	KrasLSL-comG12D/+	No tamoxifen	10718.5	6695.96	26.828	0.00400659	9324.69	5004.53	109.364	0.021853
	KrasLSL-natG12D/+	1	6919.96	5288.89	1528.99	0.289095	3656.82	3635.82	1063.04	0.29238
	KrasLSL-natG12D/+	2	4223.31	4358.77	2044.53	0.469061	4979.65	5230.11	2818.94	0.538983
	KrasLSL-comG12D/+	1	1555.7	1180.58	33.536	0.0284064	1026.87	1146.99	334.071	0.291259
	KrasLSL-comG12D/+	2	5972.01	4681.06	1414.65	0.302207	4568.18	3949.11	1691.23	0.428257
	KrasLSL-natQ61R/+	1	540.899	1777.75	110.485	0.0621488	70.95	370.314	366.485	0.98966
	KrasLSL-natQ61R/+	2	6499.84	5567.6	3628.18	0.651661	5725.18	5127.11	5197.11	1.01365
	KrasLSL-comQ61R/+	1	3128.82	6771.89	3212.3	0.474359	775.749	4099.53	1978.23	0.482552
	KrasLSL-comQ61R/+	2	2704.11	4721.35	1092.41	0.231376	1259.16	3563.18	969.456	0.272076
HEART	KrasLSL-comG12D/+	No tamoxifen	5052.31	2044.77	52.828	0.0258357	8534.55	6627.5	52.828	0.00797103
	KrasLSL-natG12D/+	1	5654.6	4556.01	1095.16	0.240378	9671.91	9843.67	4270.55	0.433837
	KrasLSL-natG12D/+	2	4251.65	4159.89	1210.77	0.291058	9576.91	10415.3	8356.79	0.802357
	KrasLSL-comG12D/+	1	2854.41	5237.38	3579.3	0.683416	8722.5	12563.7	14033.9	1.11703
	KrasLSL-comG12D/+	2	5352.89	4509.01	1402.65	0.311077	9184.91	10688.7	7781.96	0.728057
	KrasLSL-natQ61R/+	1	4495.35	3942.89	1149.7	0.291588	9289.62	9620.01	6052.55	0.629162
	KrasLSL-natQ61R/+	2	4153.06	4559.89	3059.6	0.670981	9170.91	10164.2	11504.7	1.13189
	KrasLSL-comQ61R/+	1	2540.23	3888.3	868.749	0.223426	7241.72	10191.9	4378.43	0.429598
	KrasLSL-comQ61R/+	2	5760.94	6913.72	1030.92	0.149112	9176.03	11240.5	4694.31	0.417624
LUNG	KrasLSL-comG12D/+	No tamoxifen	8250.6	4484.5	29.536	0.00658625	7952.72	8417.74	130.899	0.0155504
	KrasLSL-natG12D/+	1	8366.72	5106.08	717.406	0.1405	8944.5	9371.43	5021.26	0.535805
	KrasLSL-natG12D/+	2	5962.43	4269.67	1216.11	0.284826	8145.96	9879.6	9901.79	1.00225
	KrasLSL-comG12D/+	1	6236.26	5704.67	2399.06	0.420544	8033.43	10577.1	12405.8	1.17289
	KrasLSL-comG12D/+	2	6630.96	4181.26	966.527	0.231157	8161.55	9551.89	8906.08	0.93239
	KrasLSL-natQ61R/+	1	6385.55	6859.33	1172.87	0.170989	7420.55	10549.8	8084.79	0.766342
	KrasLSL-natQ61R/+	2	7101.03	3764.01	619.284	0.164528	8778.08	8199.31	5957.5	0.726586
	KrasLSL-comQ61R/+	1	4347.31	4108.91	582.749	0.141826	6441.06	10659.1	6439.38	0.604121
	KrasLSL-comQ61R/+	2	8096.28	4528.38	695.991	0.153695	7504.26	7266.6	4100.26	0.564261
OVARY	KrasLSL-comG12D/+	No tamoxifen	9874.91	4672.91	73.364	0.0156998	12869.5	10483.3	43.95	0.00419239
	KrasLSL-natG12D/+	1	9697.15	4171.67	456.749	0.109488	12008.4	8943.38	1981.89	0.221604
	KrasLSL-natG12D/+	2	8019.03	6051.79	2629.6	0.434516	7389.45	6489.28	2624.65	0.404459
	KrasLSL-comG12D/+	1	8112.62	5604.08	2091.89	0.37328	9352.98	7456.96	2836.48	0.38038
	KrasLSL-comG12D/+	2	639.335	2419.13	230.778	0.0953969	1349.11	779.163	113.95	0.146247
	KrasLSL-natQ61R/+	1	8255.62	6717.2	1547.23	0.230339	8951.33	8397.74	1167.94	0.139078
	KrasLSL-natQ61R/+	2	7969.03	5640.2	1810.36	0.320973	9211.74	6291.13	765.406	0.121664
	KrasLSL-comQ61R/+	1	6591.5	6945.45	2603.77	0.374889	5747.38	7586.38	2294.18	0.302408
	KrasLSL-comQ61R/+	2	9402.33	6597.91	1923.65	0.291554	9735.6	8504.55	2818.3	0.331388
