# Supplementary material for: Genetically manipulating endogenous Kras levels and oncogenic mutations in vivo influences tissue patterning of murine tumorigenesis
Source: eLife. 2022 Sep 7;11:e75715. doi: 10.7554/eLife.75715 (PMC9451540; doi:10.7554/eLife.75715)
Supplement: Supplementary file 3. [file elife-75715-supp3.xlsx]

## Sheet: Sheet1
Comparison of Survival Curves
Cohort 1	KrasLSL-comG12D/+		KrasLSL-natG12D/+		KrasLSL-natQ61R/+		KrasLSL-natQ61R/+		KrasLSL-natG12D/+		KrasLSL-natG12D/+
Cohort 2	KrasLSL-comQ61R/+		KrasLSL-comQ61R/+		KrasLSL-comQ61R/+		KrasLSL-comG12D/+		KrasLSL-natQ61R/+		KrasLSL-comG12D/+
Log-rank (Mantel-Cox) test
Chi square	39.65		52.46		50.63		34.92		0.5331		23.74
df	1		1		1		1		1		1
P value	<0.0001		<0.0001		<0.0001		<0.0001		0.4653		<0.0001
P value summary	****		****		****		****		ns		****
Are the survival curves sig different?	Yes		Yes		Yes		Yes		No		Yes
Gehan-Breslow-Wilcoxon test
Chi square	29.08		43.07		41.33		29.94		0.1573		18.99
df	1		1		1		1		1		1
P value	<0.0001		<0.0001		<0.0001		<0.0001		0.6916		<0.0001
P value summary	****		****		****		****		ns		****
Are the survival curves sig different?	Yes		Yes		Yes		Yes		No		Yes
Median survival
Cohort 1	51		150		140		140		150		150
Cohort 2	14		14		14		51		140		51
Ratio (and its reciprocal)	3.643	0.2745	10.71	0.09333	10	0.1	2.745	0.3643	1.071	0.9333	2.941	0.34
95% CI of ratio	2.056 to 6.454	0.1549 to 0.4863	6.011 to 19.10	0.05236 to 0.1664	5.574 to 17.94	0.05574 to 0.1794	1.539 to 4.896	0.2043 to 0.6497	0.5972 to 1.922	0.5202 to 1.674	1.660 to 5.211	0.1919 to 0.6024
Hazard Ratio (Mantel-Haenszel)
	C/D	D/C	A/D	D/A	B/D	D/B	B/C	C/B	A/B	B/A	A/C	C/A
Ratio (and its reciprocal)	0.05648	17.71	0.03019	33.12	0.03249	30.78	0.08619	11.6	1.258	0.7951	0.1516	6.595
95% CI of ratio	0.02309 to 0.1382	7.238 to 43.32	0.01171 to 0.07784	12.85 to 85.41	0.01264 to 0.08350	11.98 to 79.10	0.03823 to 0.1943	5.146 to 26.16	0.6795 to 2.328	0.4295 to 1.472	0.07099 to 0.3238	3.088 to 14.09
Hazard Ratio (logrank)
	C/D	D/C	A/D	D/A	B/D	D/B	B/C	C/B	A/B	B/A	A/C	C/A
Ratio (and its reciprocal)	0.2541	3.935	0.2109	4.742	0.2139	4.674	0.2467	4.054	1.23	0.813	0.3074	3.253
95% CI of ratio	0.1236 to 0.5223	1.915 to 8.089	0.09843 to 0.4519	2.213 to 10.16	0.1005 to 0.4556	2.195 to 9.955	0.1216 to 0.5002	1.999 to 8.221	0.6843 to 2.211	0.4524 to 1.461	0.1578 to 0.5988	1.670 to 6.336
