# Supplementary material for: Genetically manipulating endogenous Kras levels and oncogenic mutations in vivo influences tissue patterning of murine tumorigenesis
Source: eLife. 2022 Sep 7;11:e75715. doi: 10.7554/eLife.75715 (PMC9451540; doi:10.7554/eLife.75715)
Supplement: Supplementary file 4. [file elife-75715-supp4.xlsx]

## Sheet: Sheet2
Mouse ID	Tissue	Malignancy	Genotype (Rosa26CreERT2/+)		Abbreviations
2448	Lung	AAH, AD	KrasLSL-comG12D/+		AAH	Atypical alveolar hyperplasia
2448	Thymus	-	KrasLSL-comG12D/+		AD	Adenoma
2448	Kidney	-	KrasLSL-comG12D/+		CFP	Chronic fibrosis pancreatitis
2448	Spleen	-	KrasLSL-comG12D/+		EMH	Extramedullary hematopoiesis
2448	Liver	-	KrasLSL-comG12D/+		HS	Hemangiosarcoma
2448	Forestomach	SH	KrasLSL-comG12D/+		HAD	Hepatic Adenoma
2053	Lung	-	KrasLSL-natQ61R/+		IL	Inflammatory lesions
2053	Thymus	LC	KrasLSL-natQ61R/+		L	Lymphoma
2053	Liver	-	KrasLSL-natQ61R/+		LC	Lymphoid Cuffing
2053	Forestomach	-	KrasLSL-natQ61R/+		LI	Leukemic/lymphoma infiltrate
2053	Kidney	-	KrasLSL-natQ61R/+		MCFC	minimal centrilobular fatty change
2053	Spleen	-	KrasLSL-natQ61R/+		MH	Medullary hyperplasia
2053	Pancreas	-	KrasLSL-natQ61R/+		ML	Malignant Lymphoma
2554	Lung	AAH, AD, ML	KrasLSL-natQ61R/+		MPD	Myeloproliferative Disease
2554	Thymus	ML	KrasLSL-natQ61R/+		PC	Pulmonary carcinoma
2554	Liver	ML	KrasLSL-natQ61R/+		SH	Squamous hyperplasia/papilloma
2554	Forestomach	-	KrasLSL-natQ61R/+		TA	Thymic Atrophy
2554	Kidney	ML	KrasLSL-natQ61R/+
2554	Spleen	-	KrasLSL-natQ61R/+
2554	Pancreas	-	KrasLSL-natQ61R/+
2554	lymph node	-	KrasLSL-natQ61R/+
1519	Lung	-	Kras+/+
1519	Thymus	LC	Kras+/+
1519	Liver	HAD	Kras+/+
1519	Forestomach	-	Kras+/+
1519	Kidney	-	Kras+/+
1519	Spleen	-	Kras+/+
1519	Pancreas	-	Kras+/+
1519	Oral	-	Kras+/+
1377	Lung	AAH	Kras+/+
1377	Thymus	-	Kras+/+
1377	Liver	-	Kras+/+
1377	Forestomach	-	Kras+/+
1377	Kidney	-	Kras+/+
1377	Spleen	-	Kras+/+
1377	Pancreas	-	Kras+/+
1377	Oral	-	Kras+/+
2155	Lung	AAH, AD	KrasLSL-natG12D/+
2155	Thymus	-	KrasLSL-natG12D/+
2155	Liver	-	KrasLSL-natG12D/+
2155	Forestomach	SH	KrasLSL-natG12D/+
2155	Kidney	-	KrasLSL-natG12D/+
2155	Spleen	-	KrasLSL-natG12D/+
2155	Pancreas	-	KrasLSL-natG12D/+
2155	Oral	SH	KrasLSL-natG12D/+
2155	Lymph node	-	KrasLSL-natG12D/+
2517	Lung	AAH, AD	KrasLSL-comG12D/+
2517	Thymus	MH	KrasLSL-comG12D/+
2517	Liver	-	KrasLSL-comG12D/+
2517	Forestomach	SH	KrasLSL-comG12D/+
2517	Kidney	-	KrasLSL-comG12D/+
2517	Spleen	-	KrasLSL-comG12D/+
2517	Pancreas	-	KrasLSL-comG12D/+
2517	Oral	SH	KrasLSL-comG12D/+
2455	Lung	AAH, AD	KrasLSL-natG12D/+
2455	Thymus	-	KrasLSL-natG12D/+
2455	Liver	-	KrasLSL-natG12D/+
2455	Forestomach	-	KrasLSL-natG12D/+
2455	Kidney	-	KrasLSL-natG12D/+
2455	Spleen	-	KrasLSL-natG12D/+
2455	Pancreas	-	KrasLSL-natG12D/+
2455	Oral	SH	KrasLSL-natG12D/+
2095	Lung	AAH, BH, MPD	KrasLSL-comQ61R/+
2095	Thymus	-	KrasLSL-comQ61R/+
2095	Liver	MPD	KrasLSL-comQ61R/+
2095	Forestomach	SH	KrasLSL-comQ61R/+
2095	Kidney	-	KrasLSL-comQ61R/+
2095	Spleen	MPD	KrasLSL-comQ61R/+
2095	Pancreas	-	KrasLSL-comQ61R/+
2095	Oral	SH	KrasLSL-comQ61R/+
2161	Lung	AAH, AD, BH, MPD	KrasLSL-comQ61R/+
2161	Thymus	-	KrasLSL-comQ61R/+
2161	Liver	MPD	KrasLSL-comQ61R/+
2161	Forestomach	SH	KrasLSL-comQ61R/+
2161	Kidney	-	KrasLSL-comQ61R/+
2161	Spleen	-	KrasLSL-comQ61R/+
2161	Pancreas	-	KrasLSL-comQ61R/+
2161	Pancreatic lymph node	MPD	KrasLSL-comQ61R/+
2161	Oral	SH	KrasLSL-comQ61R/+
2162	Lung	AAH, AD, BH, MPD	KrasLSL-comQ61R/+
2162	Thymus	-	KrasLSL-comQ61R/+
2162	Liver	MPD	KrasLSL-comQ61R/+
2162	Forestomach	SH	KrasLSL-comQ61R/+
2162	Kidney	MPD	KrasLSL-comQ61R/+
2162	Spleen	MPD	KrasLSL-comQ61R/+
2162	Pancreas	MPD	KrasLSL-comQ61R/+
2162	Oral	SH	KrasLSL-comQ61R/+
1376	Lung	-	Kras+/+
1376	Thymus	-	Kras+/+
1376	Liver	-	Kras+/+
1376	Forestomach	-	Kras+/+
1376	Kidney	-	Kras+/+
1376	Spleen	-	Kras+/+
1376	Pancreas	-	Kras+/+
1376	Oral	-	Kras+/+
1382	Lung	-	Kras+/+
1382	Thymus	LC	Kras+/+
1382	Liver	-	Kras+/+
1382	Forestomach	-	Kras+/+
1382	Kidney	-	Kras+/+
1382	Spleen	-	Kras+/+
1382	Pancreas	-	Kras+/+
1382	Oral	-	Kras+/+
2093	Lung	AAH, AD, BH, MPD	KrasLSL-comQ61R/+
2093	Thymus	-	KrasLSL-comQ61R/+
2093	Liver	MPD	KrasLSL-comQ61R/+
2093	Forestomach	SH	KrasLSL-comQ61R/+
2093	Kidney	MPD	KrasLSL-comQ61R/+
2093	Spleen	MPD	KrasLSL-comQ61R/+
2093	Pancreas	MPD	KrasLSL-comQ61R/+
2093	Oral	SH	KrasLSL-comQ61R/+
1966	Lung	AAH, AD, BH, ML	KrasLSL-comG12D/+
1966	Thymus	ML	KrasLSL-comG12D/+
1966	Liver	ML	KrasLSL-comG12D/+
1966	Forestomach	SH	KrasLSL-comG12D/+
1966	Kidney	ML	KrasLSL-comG12D/+
1966	Spleen	ML	KrasLSL-comG12D/+
1966	Pancreas	-	KrasLSL-comG12D/+
1966	Oral	SH	KrasLSL-comG12D/+
1939	Lung	AAH, AD, ML	KrasLSL-natG12D/+
1939	Thymus	ML	KrasLSL-natG12D/+
1939	Liver	ML	KrasLSL-natG12D/+
1939	Forestomach	-	KrasLSL-natG12D/+
1939	Kidney	ML	KrasLSL-natG12D/+
1939	Spleen	ML	KrasLSL-natG12D/+
1939	Pancreas	-	KrasLSL-natG12D/+
1939	Oral	-	KrasLSL-natG12D/+
2057	Lung	-	Kras+/+
2057	Thymus	-	Kras+/+
2057	Liver	-	Kras+/+
2057	Forestomach	-	Kras+/+
2057	Kidney	-	Kras+/+
2057	Spleen	-	Kras+/+
2057	Pancreas	-	Kras+/+
2057	Oral	-	Kras+/+
2598	Lung	AAH, AD	KrasLSL-comQ61R/+
2598	Thymus	MPD	KrasLSL-comQ61R/+
2598	Liver	MPD	KrasLSL-comQ61R/+
2598	Forestomach	SH	KrasLSL-comQ61R/+
2598	Kidney	-	KrasLSL-comQ61R/+
2598	Spleen	MPD	KrasLSL-comQ61R/+
2598	Pancreas	-	KrasLSL-comQ61R/+
2598	pancreatic lymph node	MPD	KrasLSL-comQ61R/+
2598	Oral	SH	KrasLSL-comQ61R/+
2129	Lung	AAH, AD	KrasLSL-comG12D/+
2129	Thymus	-	KrasLSL-comG12D/+
2129	Liver	-	KrasLSL-comG12D/+
2129	Forestomach	SH	KrasLSL-comG12D/+
2129	Kidney	-	KrasLSL-comG12D/+
2129	Spleen	-	KrasLSL-comG12D/+
2129	Pancreas	-	KrasLSL-comG12D/+
2129	Ovary	-	KrasLSL-comG12D/+
2129	Oral	SH	KrasLSL-comG12D/+
2032	Lung	AAH	KrasLSL-comG12D/+
2032	Thymus	LI	KrasLSL-comG12D/+
2032	Liver	LI	KrasLSL-comG12D/+
2032	Forestomach	SH	KrasLSL-comG12D/+
2032	Kidney	-	KrasLSL-comG12D/+
2032	Spleen	LI	KrasLSL-comG12D/+
2032	Pancreas		KrasLSL-comG12D/+
2032	Oral	SH	KrasLSL-comG12D/+
2288	Lung	AAH, AD, ML	KrasLSL-natG12D/+
2288	Thymus	ML	KrasLSL-natG12D/+
2288	Liver	ML	KrasLSL-natG12D/+
2288	Forestomach	SH	KrasLSL-natG12D/+
2288	Kidney	ML	KrasLSL-natG12D/+
2288	Spleen	ML	KrasLSL-natG12D/+
2288	Pancreas	CFP	KrasLSL-natG12D/+
2288	Oral	-	KrasLSL-natG12D/+
2145	Lung	AAH, AD	KrasLSL-natG12D/+
2145	Thymus	TA	KrasLSL-natG12D/+
2145	Liver	-	KrasLSL-natG12D/+
2145	Forestomach	SH	KrasLSL-natG12D/+
2145	Kidney	-	KrasLSL-natG12D/+
2145	Spleen	-	KrasLSL-natG12D/+
2145	Pancreas	-	KrasLSL-natG12D/+
2145	Oral	-	KrasLSL-natG12D/+
2171	Lung	AAH, AD, ML	KrasLSL-natQ61R/+
2171	Thymus	ML	KrasLSL-natQ61R/+
2171	Liver	ML	KrasLSL-natQ61R/+
2171	Forestomach	-	KrasLSL-natQ61R/+
2171	Kidney	ML	KrasLSL-natQ61R/+
2171	Spleen	ML	KrasLSL-natQ61R/+
2171	Pancreas	-	KrasLSL-natQ61R/+
2171	Oral	SH	KrasLSL-natQ61R/+
2552	Lung	AAH, AD, AC, ML	KrasLSL-natQ61R/+
2552	Thymus	ML	KrasLSL-natQ61R/+
2552	Liver	ML	KrasLSL-natQ61R/+
2552	Forestomach	-	KrasLSL-natQ61R/+
2552	Kidney	ML	KrasLSL-natQ61R/+
2552	Spleen	ML	KrasLSL-natQ61R/+
2552	Pancreas	-	KrasLSL-natQ61R/+
2552	Oral	SH	KrasLSL-natQ61R/+
2229	Lung	AAH, AD	KrasLSL-natQ61R/+
2229	Thymus	-	KrasLSL-natQ61R/+
2229	Liver	-	KrasLSL-natQ61R/+
2229	Forestomach	-	KrasLSL-natQ61R/+
2229	Kidney	-	KrasLSL-natQ61R/+
2229	Spleen	-	KrasLSL-natQ61R/+
2229	Pancreas	-	KrasLSL-natQ61R/+
1520	Lung	AD, ML	KrasLSL-natG12D/+
1520	Thymus	ML	KrasLSL-natG12D/+
1520	Liver	ML	KrasLSL-natG12D/+
1520	Forestomach	SH	KrasLSL-natG12D/+
1520	Kidney	ML	KrasLSL-natG12D/+
1520	Spleen	ML	KrasLSL-natG12D/+
1520	Pancreas	-	KrasLSL-natG12D/+
1520	Oral	-	KrasLSL-natG12D/+
2224	Lung	AD	KrasLSL-natQ61R/+
2224	Thymus	-	KrasLSL-natQ61R/+
2224	Liver	EMH	KrasLSL-natQ61R/+
2224	Forestomach	-	KrasLSL-natQ61R/+
2224	Kidney	-	KrasLSL-natQ61R/+
2224	Spleen	-	KrasLSL-natQ61R/+
2224	Pancreas	-	KrasLSL-natQ61R/+
2224	Ovary	-	KrasLSL-natQ61R/+
2224	Oral	-	KrasLSL-natQ61R/+
3396	Lung	AAH, AD	KrasLSL-comG12D/+
3396	Thymus	MH	KrasLSL-comG12D/+
3396	Liver	ML	KrasLSL-comG12D/+
3396	Forestomach	SH	KrasLSL-comG12D/+
3396	Kidney	-	KrasLSL-comG12D/+
3396	Spleen	ML	KrasLSL-comG12D/+
3396	Pancreas	-	KrasLSL-comG12D/+
3396	Oral	SH	KrasLSL-comG12D/+
3376	Lung	AAH, AD	KrasLSL-comG12D/+
3376	Thymus	TA	KrasLSL-comG12D/+
3376	Liver	ML	KrasLSL-comG12D/+
3376	Forestomach	SH	KrasLSL-comG12D/+
3376	Kidney	LI	KrasLSL-comG12D/+
3376	Spleen	ML	KrasLSL-comG12D/+
3376	Pancreas	-	KrasLSL-comG12D/+
3376	Ovary	LI	KrasLSL-comG12D/+
3376	Oral	SH	KrasLSL-comG12D/+
2558	Lung	AAH, AD	KrasLSL-natQ61R/+
2558	Thymus	-	KrasLSL-natQ61R/+
2558	Liver	-	KrasLSL-natQ61R/+
2558	Forestomach	-	KrasLSL-natQ61R/+
2558	Kidney	-	KrasLSL-natQ61R/+
2558	Spleen	-	KrasLSL-natQ61R/+
2558	Pancreas	-	KrasLSL-natQ61R/+
2056	Lung	AD	Kras+/+
2056	Thymus	-	Kras+/+
2056	Liver	-	Kras+/+
2056	Forestomach	-	Kras+/+
2056	Kidney	-	Kras+/+
2056	Spleen	-	Kras+/+
2056	Pancreas	-	Kras+/+
2134	Lung	-	Kras+/+
2134	Thymus	-	Kras+/+
2134	Liver	-	Kras+/+
2134	Forestomach	-	Kras+/+
2134	Kidney	-	Kras+/+
2134	Spleen	-	Kras+/+
2134	Pancreas	-	Kras+/+
2134	Oral	-	Kras+/+
2052	Lung	IL	KrasLSL-natQ61R/+
2052	Thymus	-	KrasLSL-natQ61R/+
2052	Liver	-	KrasLSL-natQ61R/+
2052	Forestomach	-	KrasLSL-natQ61R/+
2052	Kidney	-	KrasLSL-natQ61R/+
2052	Spleen	-	KrasLSL-natQ61R/+
2052	Pancreas	-	KrasLSL-natQ61R/+
2052	Ovary	-	KrasLSL-natQ61R/+
2052	Oral	-	KrasLSL-natQ61R/+
2557	Lung	AD	KrasLSL-natQ61R/+
2557	Thymus	-	KrasLSL-natQ61R/+
2557	Liver	-	KrasLSL-natQ61R/+
2557	Forestomach	-	KrasLSL-natQ61R/+
2557	Kidney	-	KrasLSL-natQ61R/+
2557	Spleen	-	KrasLSL-natQ61R/+
2557	Pancreas	-	KrasLSL-natQ61R/+
2287	Lung	AAH, AD, AC	KrasLSL-natG12D/+
2287	Thymus	-	KrasLSL-natG12D/+
2287	Liver	-	KrasLSL-natG12D/+
2287	Forestomach	-	KrasLSL-natG12D/+
2287	Kidney	-	KrasLSL-natG12D/+
2287	Spleen	-	KrasLSL-natG12D/+
2287	Pancreas	-	KrasLSL-natG12D/+
2453	Lung	AAH	KrasLSL-natG12D/+
2453	Thymus	-	KrasLSL-natG12D/+
2453	Liver	-	KrasLSL-natG12D/+
2453	Kidney	-	KrasLSL-natG12D/+
2453	Spleen	-	KrasLSL-natG12D/+
2453	Pancreas	-	KrasLSL-natG12D/+
2453	Oral	-	KrasLSL-natG12D/+
2456	Lung	AAH	KrasLSL-natG12D/+
2456	Thymus	-	KrasLSL-natG12D/+
2456	Liver	-	KrasLSL-natG12D/+
2456	Kidney	-	KrasLSL-natG12D/+
2456	Spleen	-	KrasLSL-natG12D/+
2456	Pancreas	-	KrasLSL-natG12D/+
2456	Oral	-	KrasLSL-natG12D/+
1745	Lung	MPD	KrasLSL-comQ61R/+
1745	Thymus	MPD	KrasLSL-comQ61R/+
1745	Liver	MPD	KrasLSL-comQ61R/+
1745	Forestomach	SH	KrasLSL-comQ61R/+
1745	Kidney	MPD	KrasLSL-comQ61R/+
1745	Spleen	MPD	KrasLSL-comQ61R/+
1745	Ovary	MPD	KrasLSL-comQ61R/+
1745	Pancreas	MPD	KrasLSL-comQ61R/+
1798	Lung	AD, MPD	KrasLSL-comQ61R/+
1798	Liver	MPD	KrasLSL-comQ61R/+
1798	Forestomach	SH	KrasLSL-comQ61R/+
1798	Kidney	MPD	KrasLSL-comQ61R/+
1798	Spleen	MPD	KrasLSL-comQ61R/+
1798	Pancreas	MPD	KrasLSL-comQ61R/+
1798	Oral	SH	KrasLSL-comQ61R/+
1878	Lung	AAH, AD	KrasLSL-comG12D/+
1878	Thymus	-	KrasLSL-comG12D/+
1878	Liver	-	KrasLSL-comG12D/+
1878	Forestomach	SH	KrasLSL-comG12D/+
1878	Kidney	-	KrasLSL-comG12D/+
1878	Spleen	-	KrasLSL-comG12D/+
1878	Pancreas	-	KrasLSL-comG12D/+
2080	Lung	AAH, AD, MPD	KrasLSL-comQ61R/+
2080	Thymus	MPD	KrasLSL-comQ61R/+
2080	Liver	MPD	KrasLSL-comQ61R/+
2080	Forestomach	SH	KrasLSL-comQ61R/+
2080	Kidney	-	KrasLSL-comQ61R/+
2080	Spleen	MPD	KrasLSL-comQ61R/+
2080	Pancreas	-	KrasLSL-comQ61R/+
2080	Ovary	MPD	KrasLSL-comQ61R/+
2080	Oral	SH	KrasLSL-comQ61R/+
2075	Lung	AAH, MPD	KrasLSL-comQ61R/+
2075	Thymus	MPD	KrasLSL-comQ61R/+
2075	Liver	MPD	KrasLSL-comQ61R/+
2075	Forestomach	SH	KrasLSL-comQ61R/+
2075	Kidney	-	KrasLSL-comQ61R/+
2075	Spleen	MPD	KrasLSL-comQ61R/+
2075	Pancreas	MPD	KrasLSL-comQ61R/+
2075	Ovary	MPD	KrasLSL-comQ61R/+
2075	Oral	SH	KrasLSL-comQ61R/+
2074	Lung	AAH, AD, MPD	KrasLSL-comQ61R/+
2074	Thymus	MPD	KrasLSL-comQ61R/+
2074	Liver	MPD	KrasLSL-comQ61R/+
2074	Forestomach	SH	KrasLSL-comQ61R/+
2074	Kidney	-	KrasLSL-comQ61R/+
2074	Spleen	MPD	KrasLSL-comQ61R/+
2074	Ovary	MPD	KrasLSL-comQ61R/+
2074	Pancreas	MPD	KrasLSL-comQ61R/+
2130	Lung	AAH, AD	KrasLSL-comG12D/+
2130	Thymus	-	KrasLSL-comG12D/+
2130	Liver	LI	KrasLSL-comG12D/+
2130	Forestomach	SH	KrasLSL-comG12D/+
2130	Kidney	LI	KrasLSL-comG12D/+
2130	Spleen	LI	KrasLSL-comG12D/+
2130	Pancreas	-	KrasLSL-comG12D/+
2130	Ovary	-	KrasLSL-comG12D/+
2130	Oral	SH	KrasLSL-comG12D/+
2173	Lung	ML	KrasLSL-natQ61R/+
2173	Thymus	ML	KrasLSL-natQ61R/+
2173	Liver	ML	KrasLSL-natQ61R/+
2173	Forestomach	-	KrasLSL-natQ61R/+
2173	Kidney	ML	KrasLSL-natQ61R/+
2173	Spleen	ML	KrasLSL-natQ61R/+
2173	Pancreas	-	KrasLSL-natQ61R/+
2173	Oral	-	KrasLSL-natQ61R/+
1933	Lung	AAH, AD	KrasLSL-comG12D/+
1933	Thymus	MH	KrasLSL-comG12D/+
1933	Liver	-	KrasLSL-comG12D/+
1933	Forestomach	SH	KrasLSL-comG12D/+
1933	Kidney	-	KrasLSL-comG12D/+
1933	Spleen	ML	KrasLSL-comG12D/+
1933	Pancreas	-	KrasLSL-comG12D/+
1933	Oral	SH	KrasLSL-comG12D/+
2461	Lung	-	KrasLSL-natG12D/+
2461	Thymus	-	KrasLSL-natG12D/+
2461	Liver	-	KrasLSL-natG12D/+
2461	Forestomach	-	KrasLSL-natG12D/+
2461	Kidney	-	KrasLSL-natG12D/+
2461	Spleen	-	KrasLSL-natG12D/+
2461	Pancreas	-	KrasLSL-natG12D/+
2461	Oral	-	KrasLSL-natG12D/+
2680	liver	MCFC	KrasLSL-rareG12D/+
2680	kidney	-	KrasLSL-rareG12D/+
2680	pancreas	-	KrasLSL-rareG12D/+
2680	spleen	-	KrasLSL-rareG12D/+
2680	forestomach	-	KrasLSL-rareG12D/+
2680	oral	-	KrasLSL-rareG12D/+
2680	thymus	-	KrasLSL-rareG12D/+
2680	lung	-	KrasLSL-rareG12D/+
2680	mesenteric lymph	-	KrasLSL-rareG12D/+
2680	femur	-	KrasLSL-rareG12D/+
2682	forestomach	-	KrasLSL-rareG12D/+
2682	kidney	-	KrasLSL-rareG12D/+
2682	oral	-	KrasLSL-rareG12D/+
2682	spleen	L	KrasLSL-rareG12D/+
2682	pancreas	L	KrasLSL-rareG12D/+
2682	thymus	-	KrasLSL-rareG12D/+
2682	lung	PC, L	KrasLSL-rareG12D/+
2682	femur	L	KrasLSL-rareG12D/+
2682	thymus 2 smaller pieces	L	KrasLSL-rareG12D/+
2682	mesenteric lymph node	L	KrasLSL-rareG12D/+
2795	skin	-	KrasLSL-rareG12D/+
2795	liver	HS	KrasLSL-rareG12D/+
2795	kidney	-	KrasLSL-rareG12D/+
2795	oral	-	KrasLSL-rareG12D/+
2795	spleen	-	KrasLSL-rareG12D/+
2795	pancreas	-	KrasLSL-rareG12D/+
2795	salivary gland	-	KrasLSL-rareG12D/+
2795	forestomach	-	KrasLSL-rareG12D/+
2795	thymus	-	KrasLSL-rareG12D/+
2795	lung	AD	KrasLSL-rareG12D/+
2795	femur	-	KrasLSL-rareG12D/+
2795	mesenteric lymph	-	KrasLSL-rareG12D/+
2797	liver	-	KrasLSL-rareG12D/+
2797	kidney	-	KrasLSL-rareG12D/+
2797	oral	-	KrasLSL-rareG12D/+
2797	spleen	-	KrasLSL-rareG12D/+
2797	pancreas	-	KrasLSL-rareG12D/+
2797	forestomach	-	KrasLSL-rareG12D/+
2797	thymus	-	KrasLSL-rareG12D/+
2797	lung	-	KrasLSL-rareG12D/+
2797	femur	-	KrasLSL-rareG12D/+
2797	mesenteric lymph	-	KrasLSL-rareG12D/+
2794	liver	-	KrasLSL-rareG12D/+
2794	kidney	-	KrasLSL-rareG12D/+
2794	oral	-	KrasLSL-rareG12D/+
2794	spleen	-	KrasLSL-rareG12D/+
2794	pancreas	-	KrasLSL-rareG12D/+
2794	salivary gland	-	KrasLSL-rareG12D/+
2794	axillary lymph	-	KrasLSL-rareG12D/+
2794	thymus	-	KrasLSL-rareG12D/+
2794	lung	-	KrasLSL-rareG12D/+
2794	femur	-	KrasLSL-rareG12D/+
2674	liver	-	KrasLSL-rareG12D/+
2674	kidney	-	KrasLSL-rareG12D/+
2674	oral	-	KrasLSL-rareG12D/+
2674	spleen	-	KrasLSL-rareG12D/+
2674	pancreas	-	KrasLSL-rareG12D/+
2674	ovary	-	KrasLSL-rareG12D/+
2674	forestomach	-	KrasLSL-rareG12D/+
2674	thymus	-	KrasLSL-rareG12D/+
2674	lung	-	KrasLSL-rareG12D/+
2674	femur	-	KrasLSL-rareG12D/+
2674	sternum	-	KrasLSL-rareG12D/+
2674	mesenteric lymph	-	KrasLSL-rareG12D/+
2677	liver	-	KrasLSL-rareG12D/+
2677	kidney	-	KrasLSL-rareG12D/+
2677	oral	-	KrasLSL-rareG12D/+
2677	spleen	-	KrasLSL-rareG12D/+
2677	pancreas	-	KrasLSL-rareG12D/+
2677	mammary lymph	-	KrasLSL-rareG12D/+
2677	forestomach	-	KrasLSL-rareG12D/+
2677	thymus	-	KrasLSL-rareG12D/+
2677	lung	-	KrasLSL-rareG12D/+
2677	mesenteric lymph	-	KrasLSL-rareG12D/+
2677	femur	-	KrasLSL-rareG12D/+
2677	sternum	-	KrasLSL-rareG12D/+
