# Supplementary material for: Genetically manipulating endogenous Kras levels and oncogenic mutations in vivo influences tissue patterning of murine tumorigenesis
Source: eLife. 2022 Sep 7;11:e75715. doi: 10.7554/eLife.75715 (PMC9451540; doi:10.7554/eLife.75715)
Supplement: Supplementary file 5. [file elife-75715-supp5.xlsx]

## Sheet: Sheet1
% Incidence
Genotype	KIDNEY	LIVER	PANCREAS	HEMATOPOIETIC	ORAL	FORESTOMACH	LUNG
KrasLSL-natG12D/+	0	0	0	30	20	40	100
KrasLSL-natQ61R/+	0	0	0	40	0	0	70
KrasLSL-comG12D/+	0	0	0	50	80	100	100
KrasLSL-comQ61R/+	0	0	0	100	80	100	100
% Hematopoietic
Genotype	Normal	Malignant Lymphoma	MPD
KrasLSL-natG12D/+	70	30	0
KrasLSL-natQ61R/+	60	40	0
KrasLSL-comG12D/+	50	50	0
KrasLSL-comQ61R/+	0	0	100
% Forestomach
Genotype	Normal	Minimal	Mild	Moderate	Severe
KrasLSL-natG12D/+	56	0	33	11	0
KrasLSL-natQ61R/+	100	0	0	0	0
KrasLSL-comG12D/+	0	0	10	20	70
KrasLSL-comQ61R/+	0	0	10	40	50
% Oral
Genotype	Normal	Minimal	Mild	Moderate	Severe
KrasLSL-natG12D/+	70	10	10	0	0
KrasLSL-natQ61R/+	100	0	0	0	0
KrasLSL-comG12D/+	0	0	0	0	100
KrasLSL-comQ61R/+	0	0	0	50	50
% Lung
Genotype	AAH	Adenoma	Carcinoma
KrasLSL-natG12D/+	90	70	10
KrasLSL-natQ61R/+	71	57	0
KrasLSL-comG12D/+	100	100	0
KrasLSL-comQ61R/+	100	70	0
	# of AAH				# of Adenoma
Animal	KrasLSL-natG12D/+	KrasLSL-natQ61R/+	KrasLSL-comG12D/+	KrasLSL-comQ61R/+	KrasLSL-natG12D/+	KrasLSL-natQ61R/+	KrasLSL-comG12D/+	KrasLSL-comQ61R/+
1	7	0	9	3	15	0	1	0
2	3	5	17	3	4	3	2	6
3	9	1	21	1	5	5	6	5
4	17	10	15	3	15	5	2	4
5	26	0	14	2	4	0	5	4
6	11	8	15	2	7	6	10	5
7	16	2	7	4	10	0	1	6
8	5		10	3	0		1	0
9	3		5	2	0		4	1
10	0		4	0	0		3	0
	Peripheral Proliferation % Area				BH Incidence				Leukemic Infiltrate Incidence
Animal	KrasLSL-natG12D/+	KrasLSL-natQ61R/+	KrasLSL-comG12D/+	KrasLSL-comQ61R/+	KrasLSL-natG12D/+	KrasLSL-natQ61R/+	KrasLSL-comG12D/+	KrasLSL-comQ61R/+	KrasLSL-natG12D/+	KrasLSL-natQ61R/+	KrasLSL-comG12D/+	KrasLSL-comQ61R/+
1	5	0	0	0				x				x
2	0	0	10	0				x		x
3	0	0	10	0			x	x	x
4	0	0	5	0				x	x			x
5	0	0	10	0			x
6	0	0	15	0								x
7	0	0	0	0						x
8	0		5	0								x
9	0		5	0								x
10	0		5	0			x					x
% of animals in genotype	10	0	80	0	0	0	30	40	20	28.5	0	60
