# Supplementary material for: Genetically manipulating endogenous Kras levels and oncogenic mutations in vivo influences tissue patterning of murine tumorigenesis
Source: eLife. 2022 Sep 7;11:e75715. doi: 10.7554/eLife.75715 (PMC9451540; doi:10.7554/eLife.75715)
Supplement: Supplementary file 6. [file elife-75715-supp6.xlsx]

## Sheet: Sheet1
KrasLSL-natG12D/+ enriched GSEA HALLMARK			KrasLSL-comQ61R/+ enriched GSEA HALLMARK
EMT	Known TFs		TNFa Signaling via NFKB	Known TF
SFRP4	PGR		MXD1	GATA1
SGCG	FOXN1		SLC2A3	ETV4
	TFAP2C		ID2	GFI1
	TFAP2A			HNF4A
COL11A1	PGR			NFE2
CYR61	FOXL1		SAT1	NFIL3
ELN	MYCN		BTG1	GFI1
	STAT1		SLC16A6	NFE2
PRRX1	PGR		DUSP5	ETV4
PCOLCE	FOXD1		CSF2	GATA1
	TFAP2C			HNF4A
	TFAP2A		FOSL1	HNF4A
	EBF2			NFE2
POSTN	IL10		NFIL3	HOXA9
	TFAP2C
COL6A3	MYCN		Complement	Known TF
FBLN2	MYOG		CDK5R1	HNF4A
			DUSP6	GATA1
Estrogen Early	Known TFs		CLU	GATA1
PDLIM3	EBF2		DUSP5	ETV4
	KLF12
FAIM3	EBF2		p53	Known TF
OLFML3	EGR3		MXD1	GATA1
SEMA3B	ZIC1		CDK5R1	HNF4A
			SAT1	NFIL3
Estrogen Late	Known TFs		BTG1	GFI1
PDLIM3	EBF2
	KLF12		KRAS signaling UP	Known TF
SCUBE2	MYCN		MMP9	NFE2
SEMA3B	ZIC1		DUSP6	GATA1
			ID2	GFI1
KRAS Signaling DN	Known TFs			HNF4A
KCNN1	EBF2			NFE2
LYPD3	MYOG		ETV4	NFIL3
	EBF2		CSF2	GATA1
PTGFR	ZIC1			HNF4A
KRT4	FOXL1
TEX15	MYOG		Inflammatory Response	Known TF
ACTC1	PGR		MXD1	GATA1
			IL18RAP	NFE2
Apical Junction	Known TFs		SELL	ETV4
ACTG2	IL10		HPN	HPN4A
CADM3	MYOG		RGS1	GATA1
CNTN1	ALX4		NLRP3	ETV4
	STAT1
ACTC1	PGR
